# Supplementary material for: The genetic architecture of host response reveals the importance of arbuscular mycorrhizae to maize cultivation
Source: eLife journal article supplement (doi:10.7554/elife.61701), 2020-11-19

# KC

model H0wt H0hun Ha Hf Hi

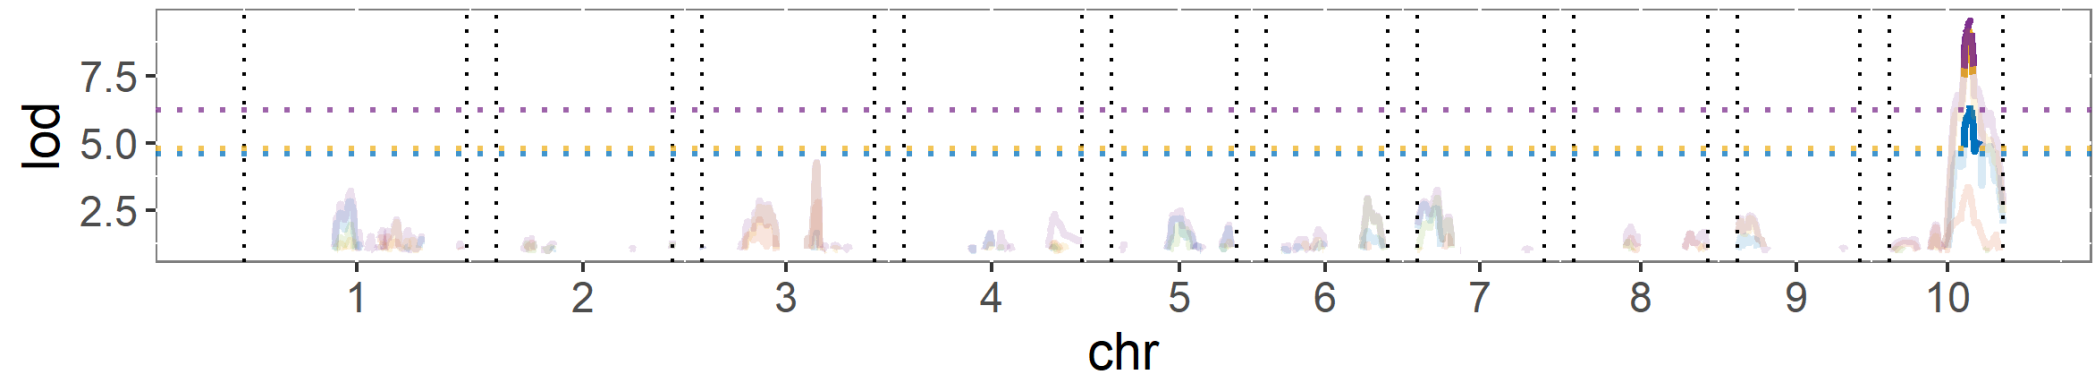

# KPR

model H0wt H0hun Ha Hf Hi

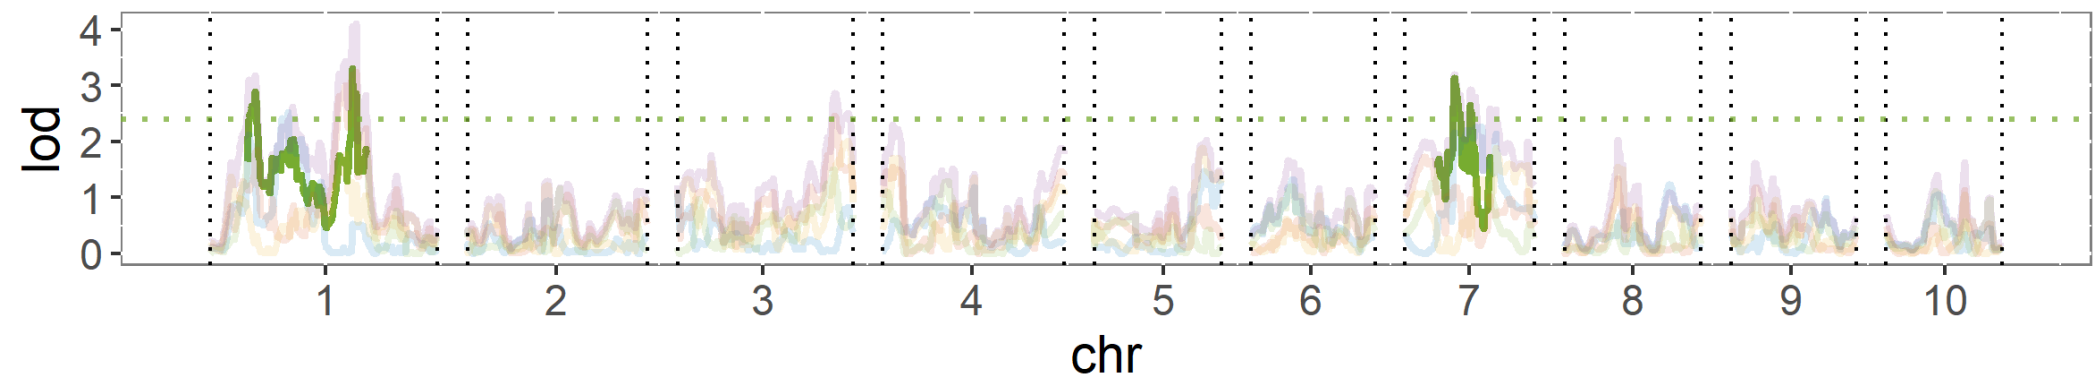

# KRN

model — H0wt — H0hun — Ha — Hf — Hi

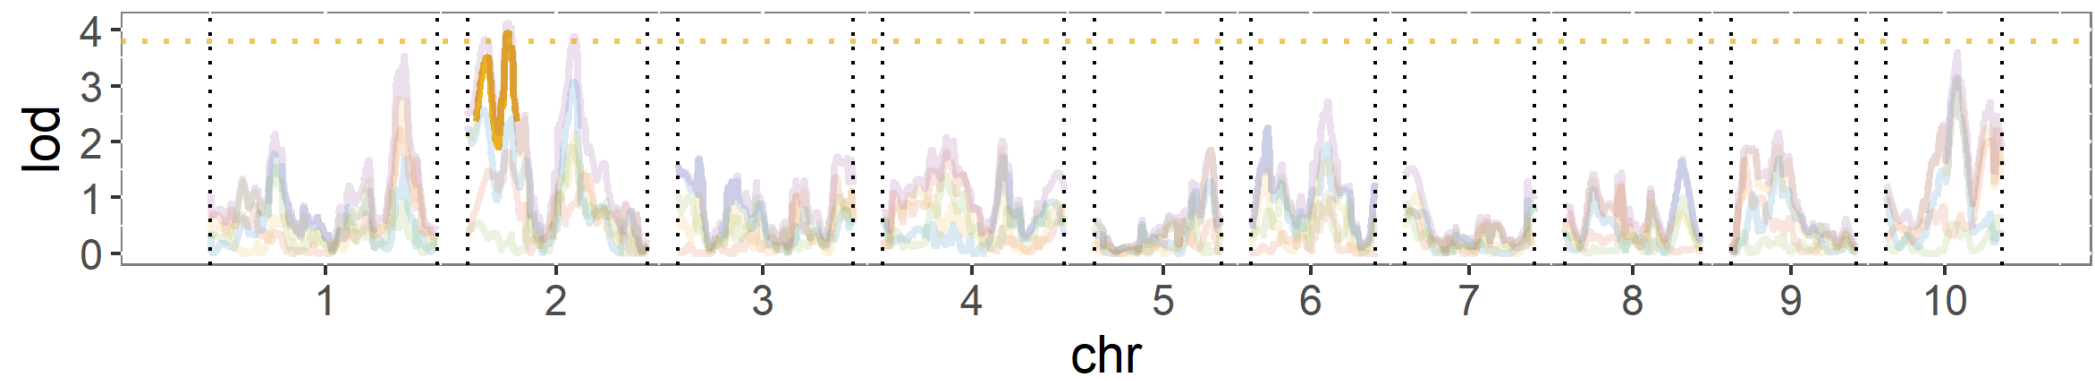

# PC1

model — H0wt — H0hun — Ha — Hf — Hi

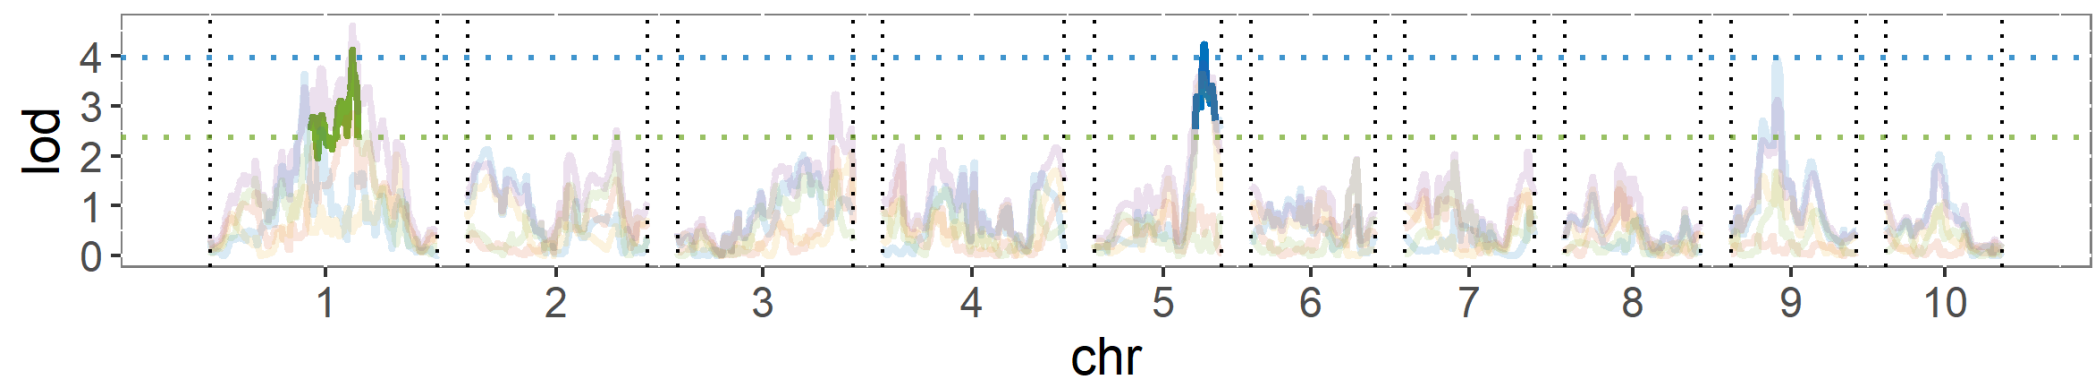

# PC2

model H0wt H0hun Ha Hf Hi

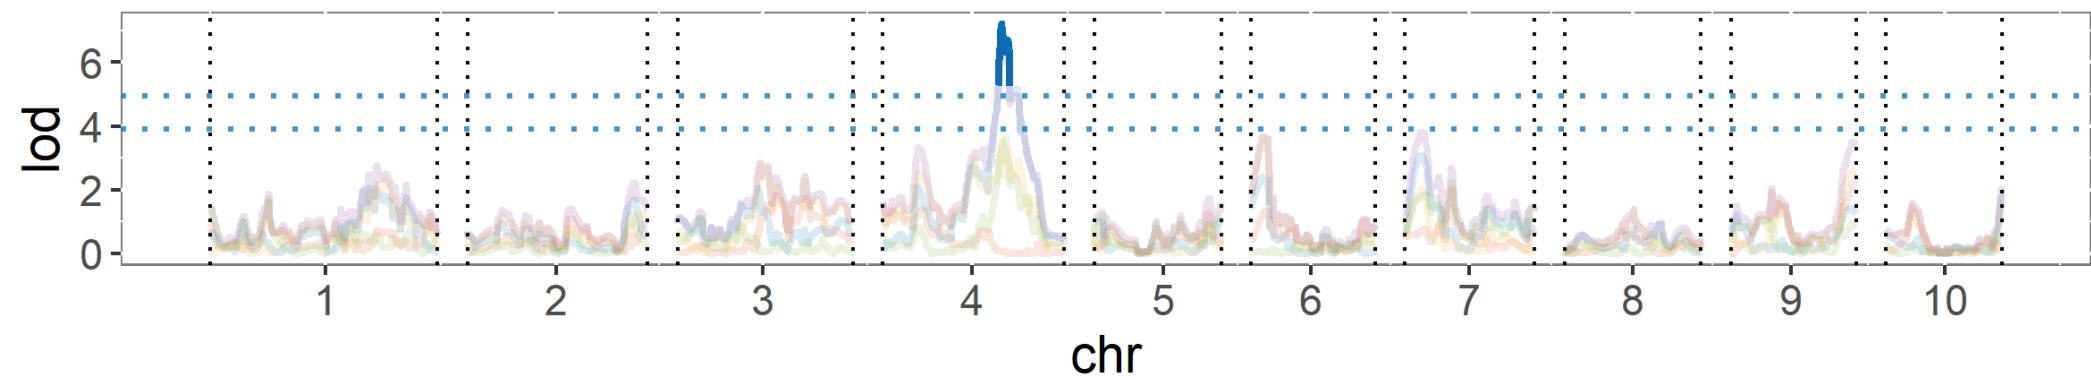

# PC3

model H0wt H0hun Ha Hf Hi

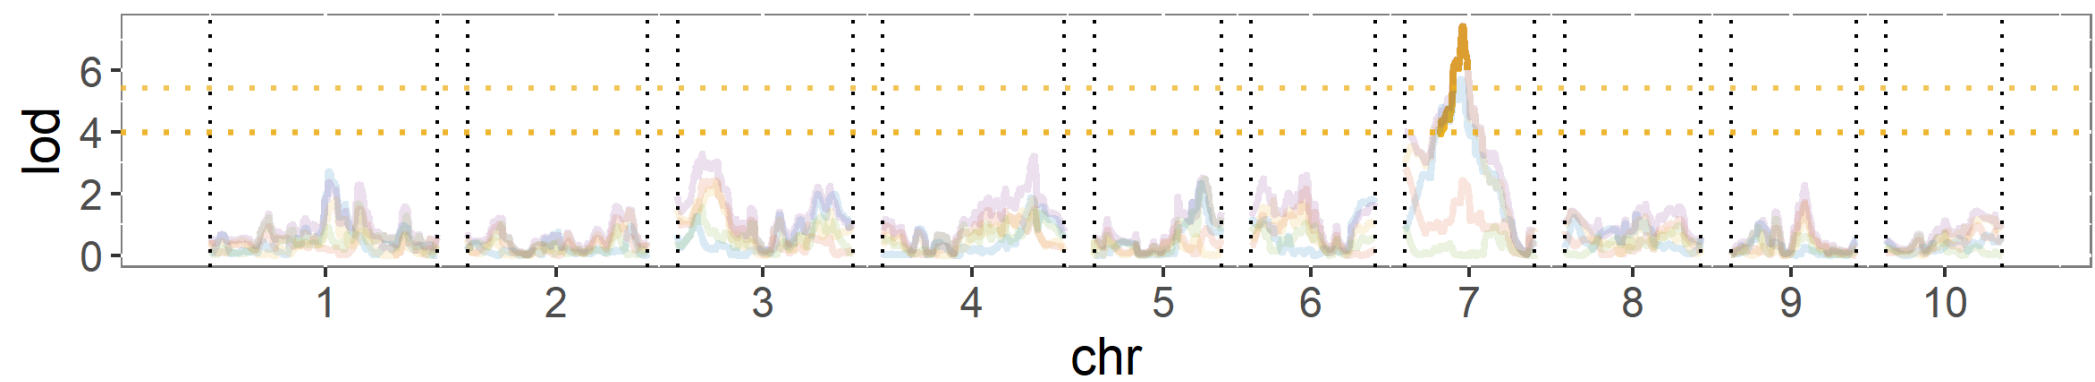

# PC4

model H0wt H0hun Ha Hf Hi

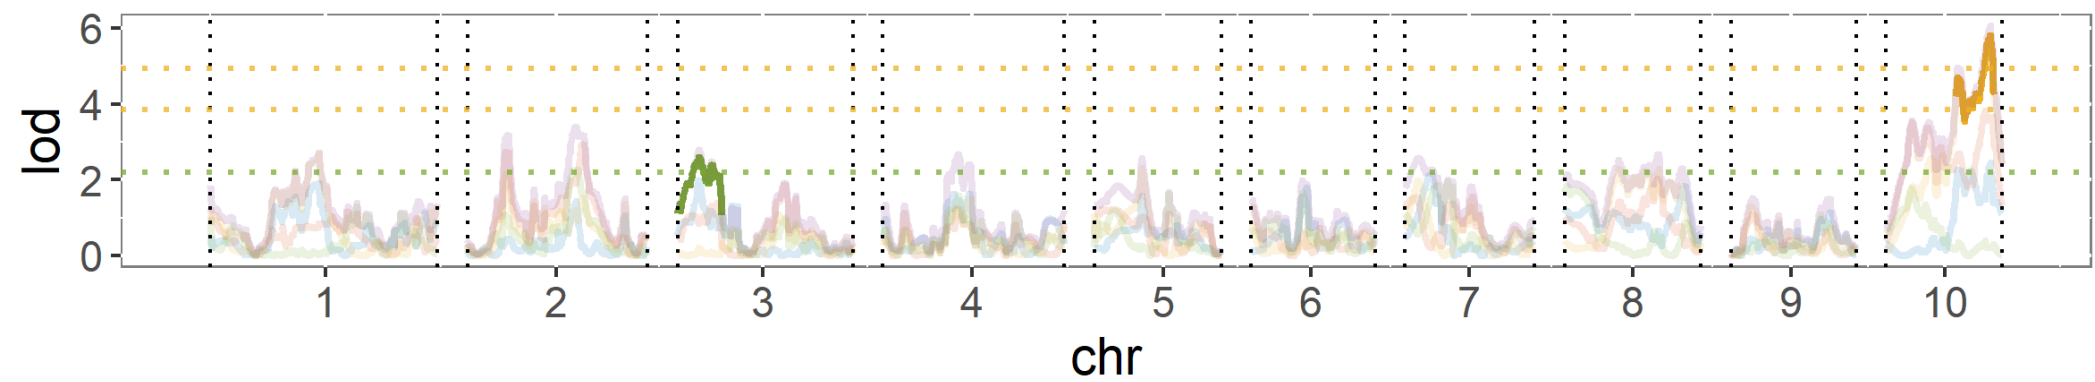

# PC5

model — H0wt — H0hun — Ha — Hf — Hi

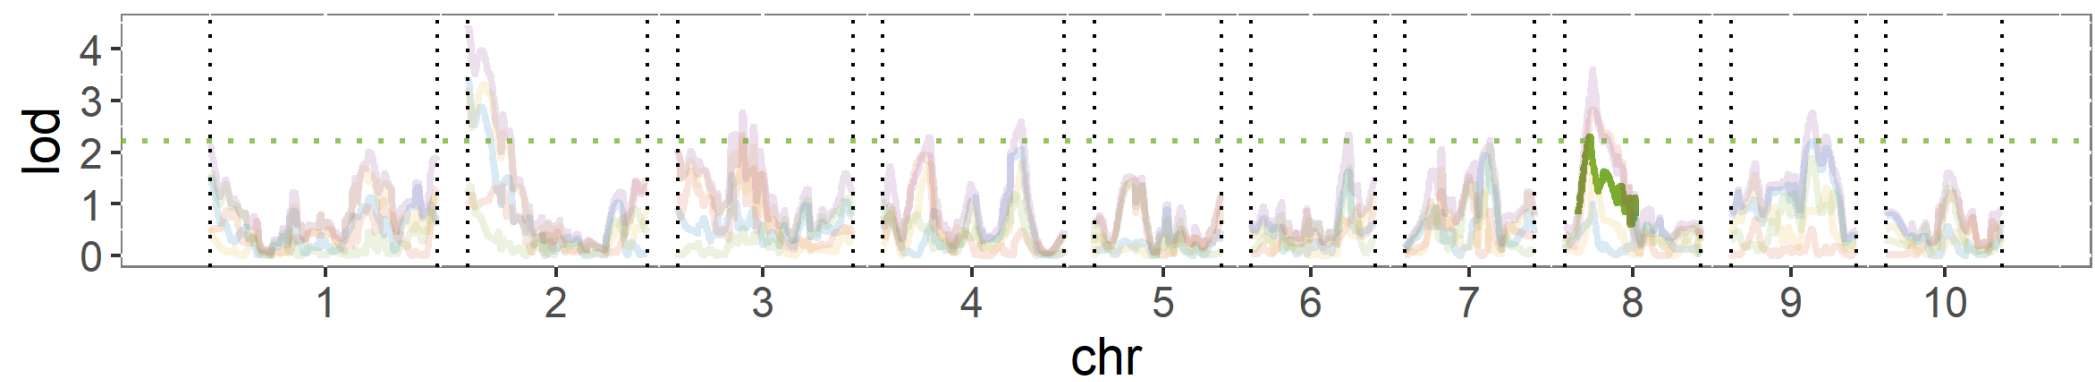



# PH

model H0wt H0hun Ha Hf Hi

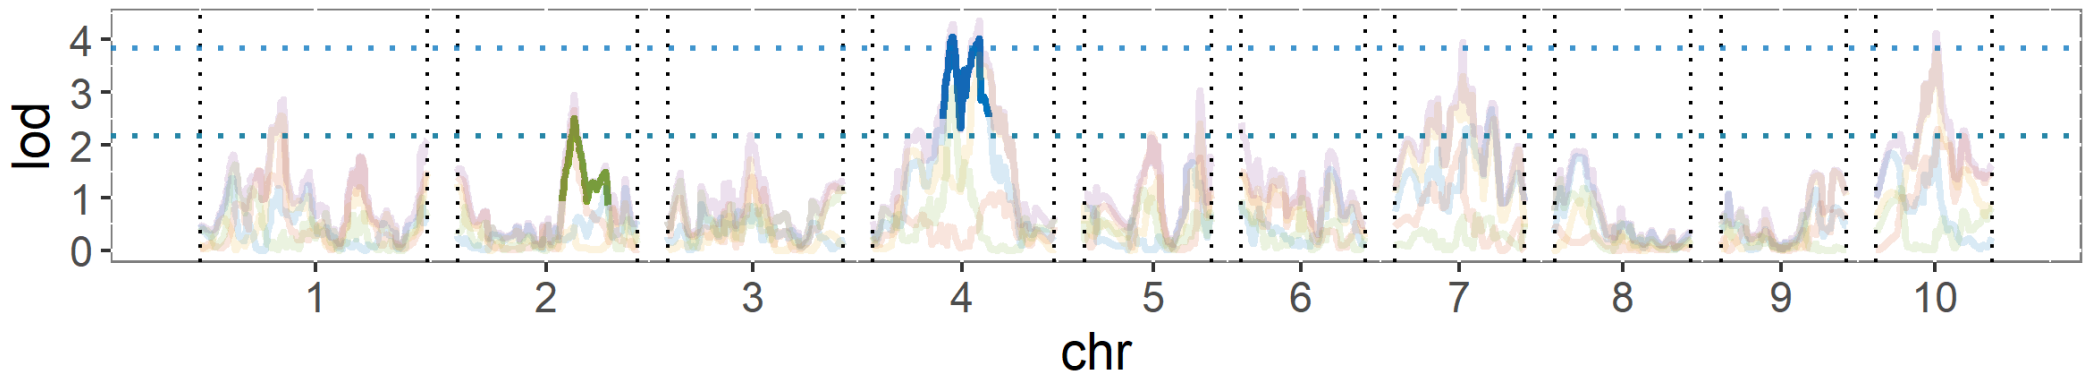

# STD

model H0wt H0hun Ha Hf Hi

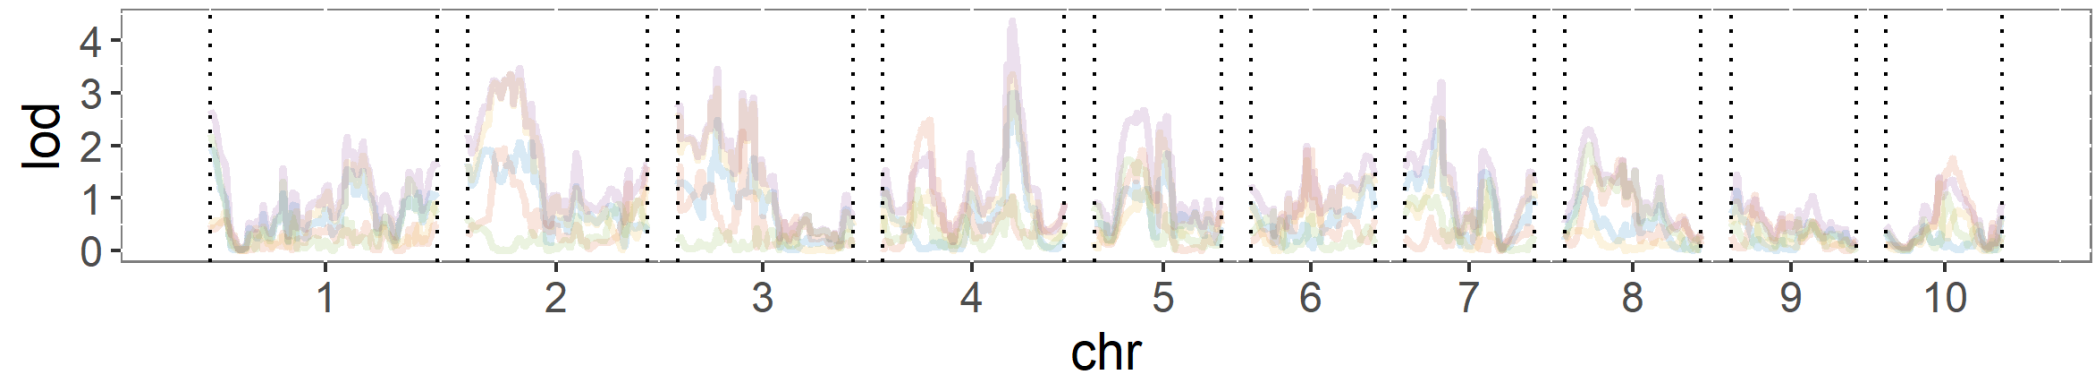

# TBN

model — H0wt — H0hun — Ha — Hf — Hi

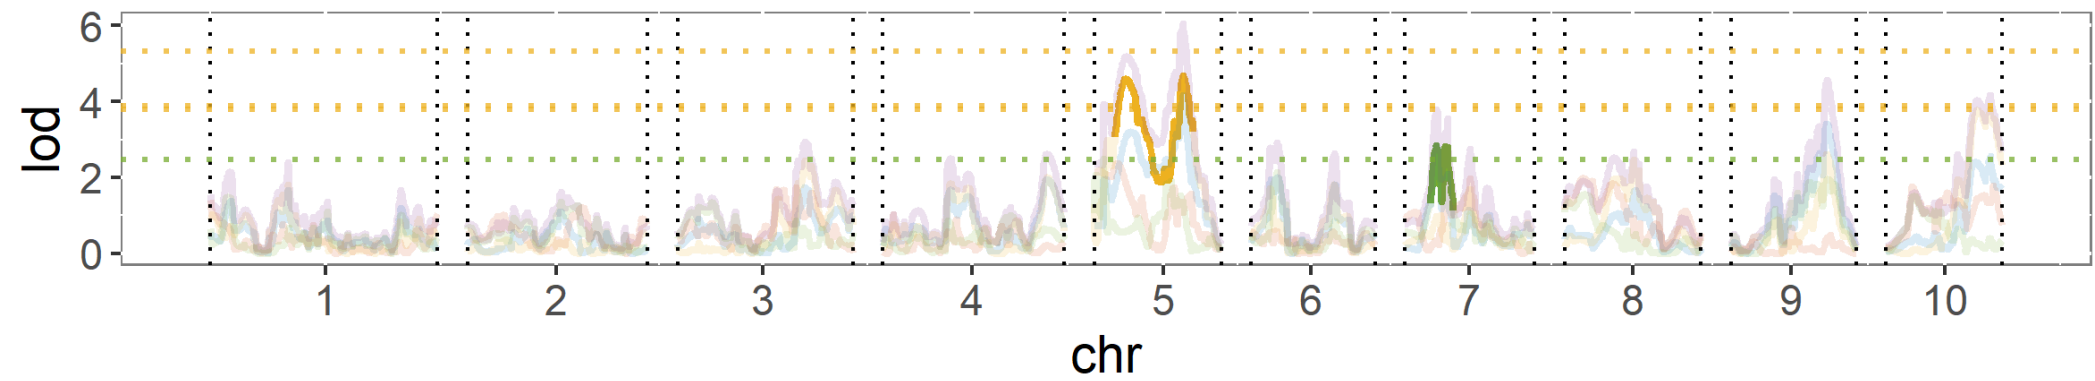

# TKN

model H0wt H0hun Ha Hf Hi

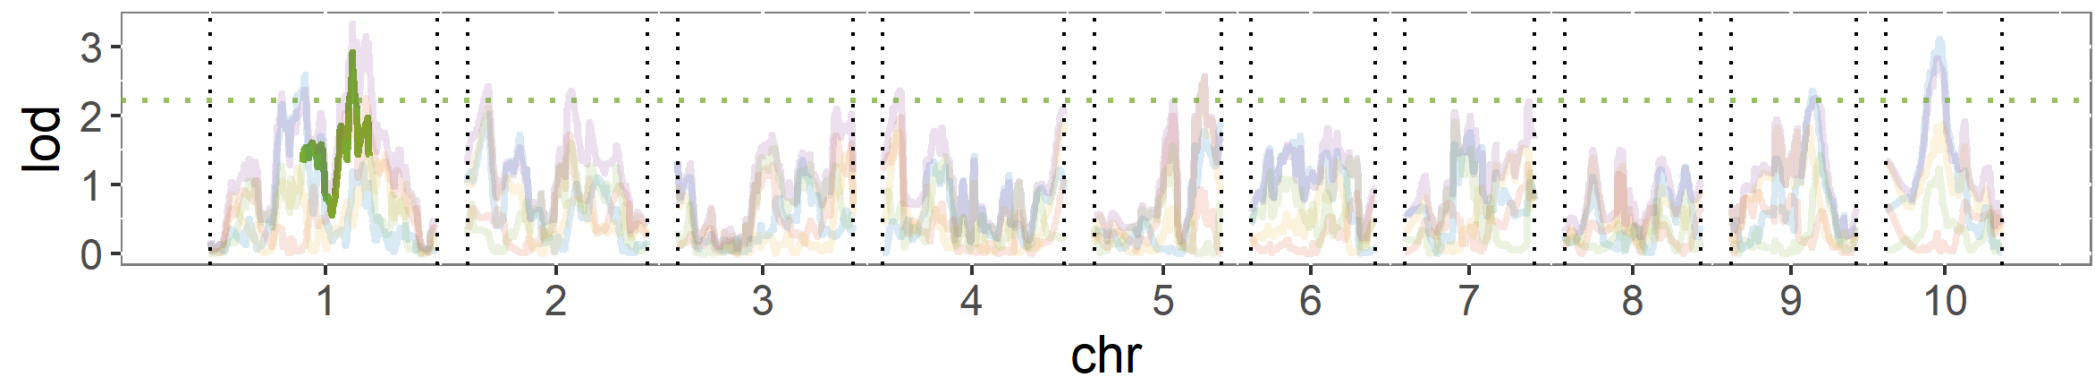

# TKW

model H0wt H0hun Ha Hf Hi

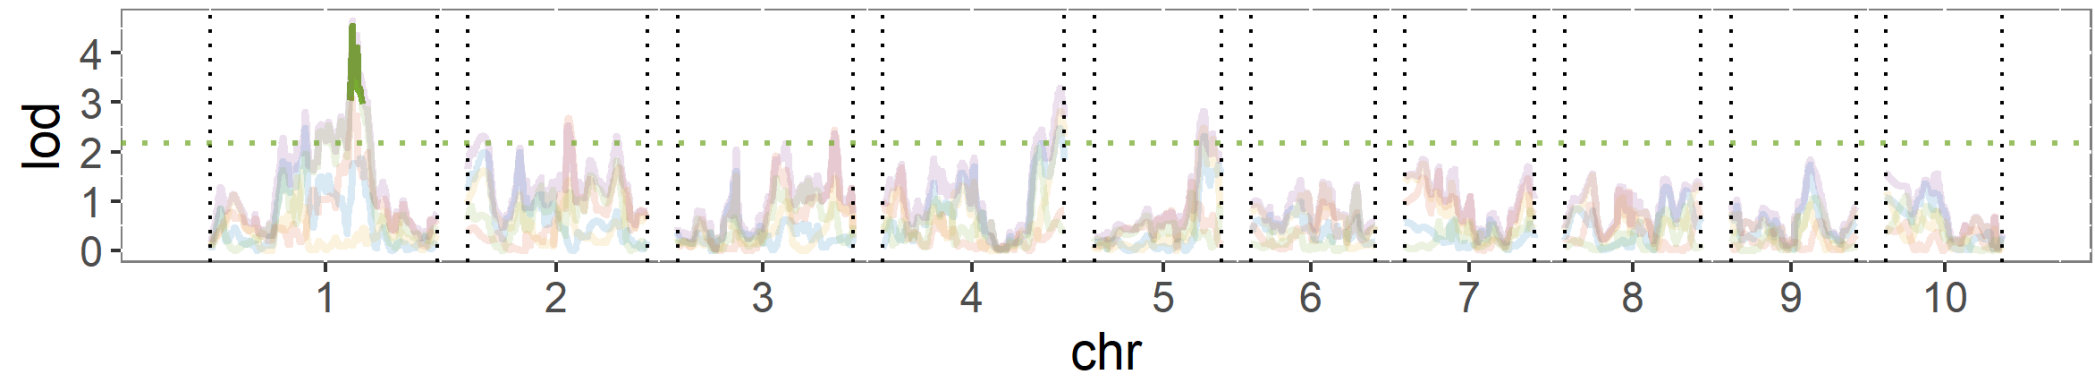

# ASI

model — H0wt — H0hun — Ha — Hf — Hi

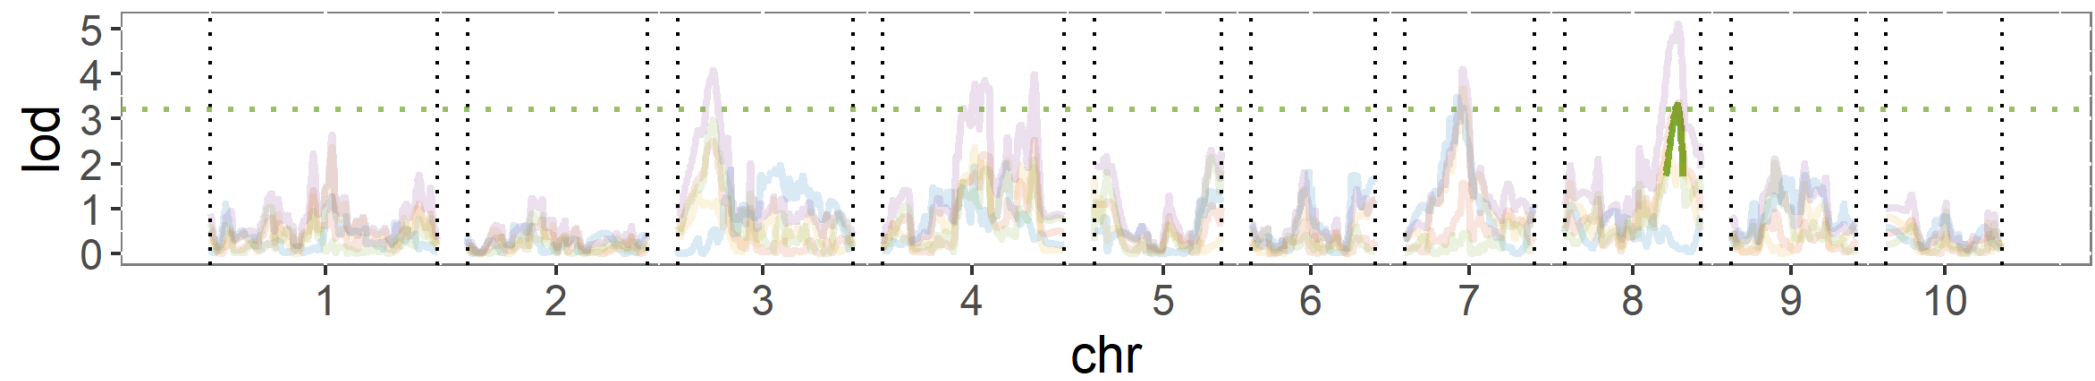

# CD

model H0wt H0hun Ha Hf Hi

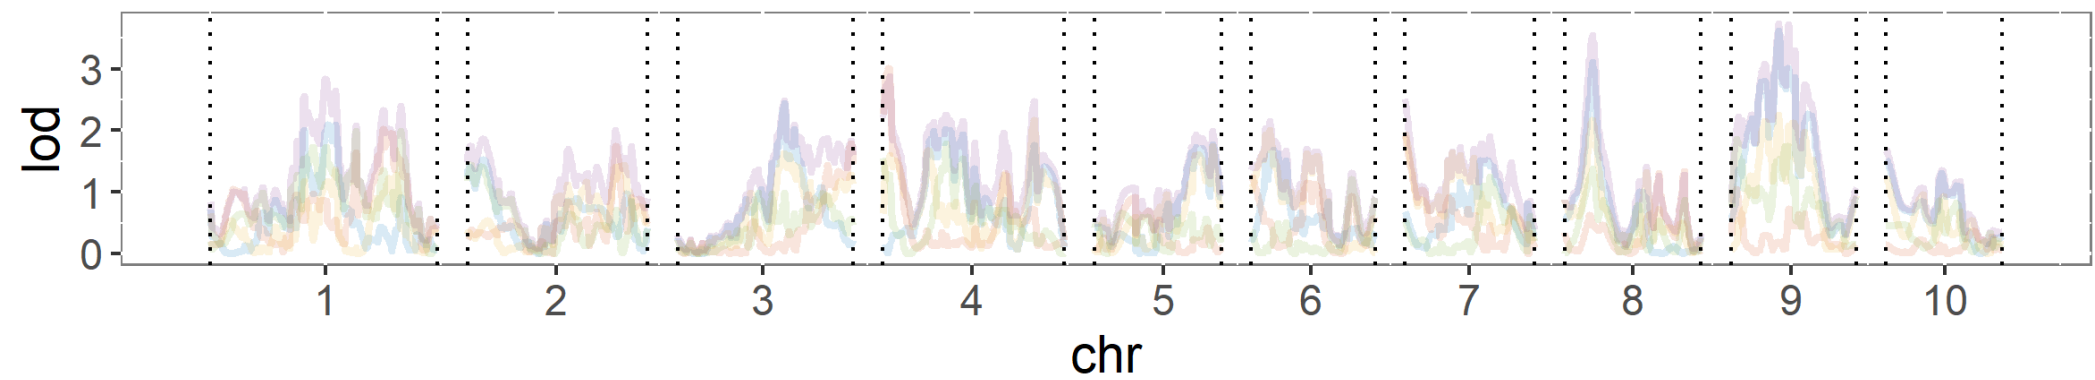

# DTA

model — H0wt — H0hun — Ha — Hf — Hi

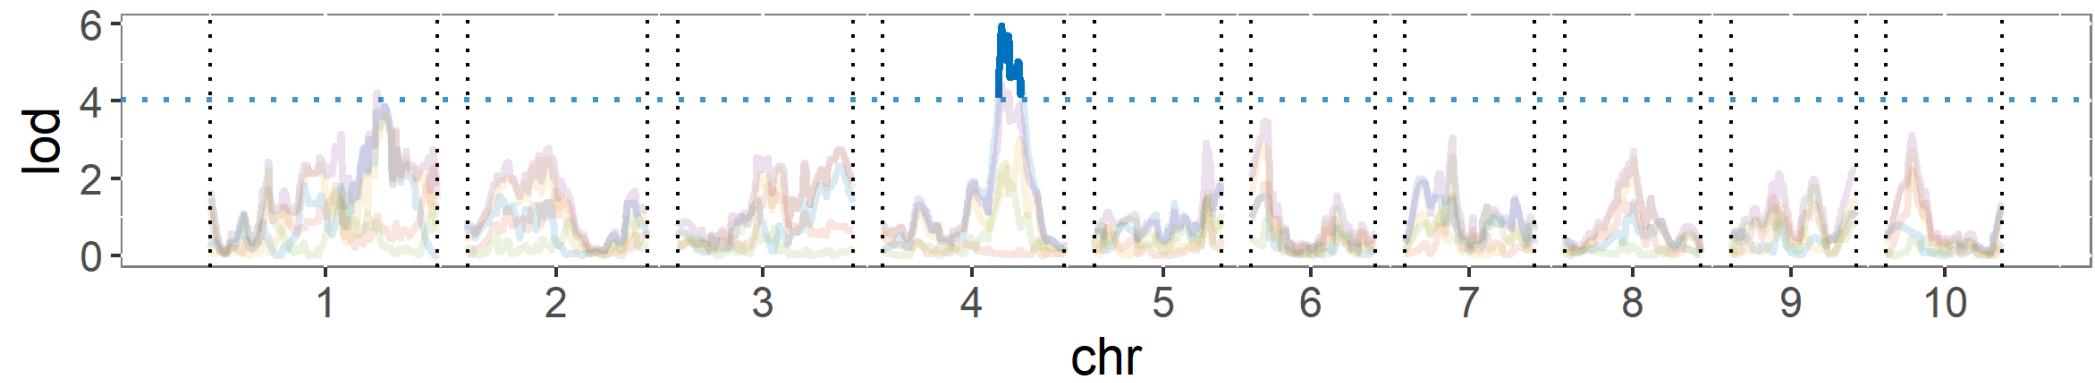



# DTS

model — H0wt — H0hun — Ha — Hf — Hi

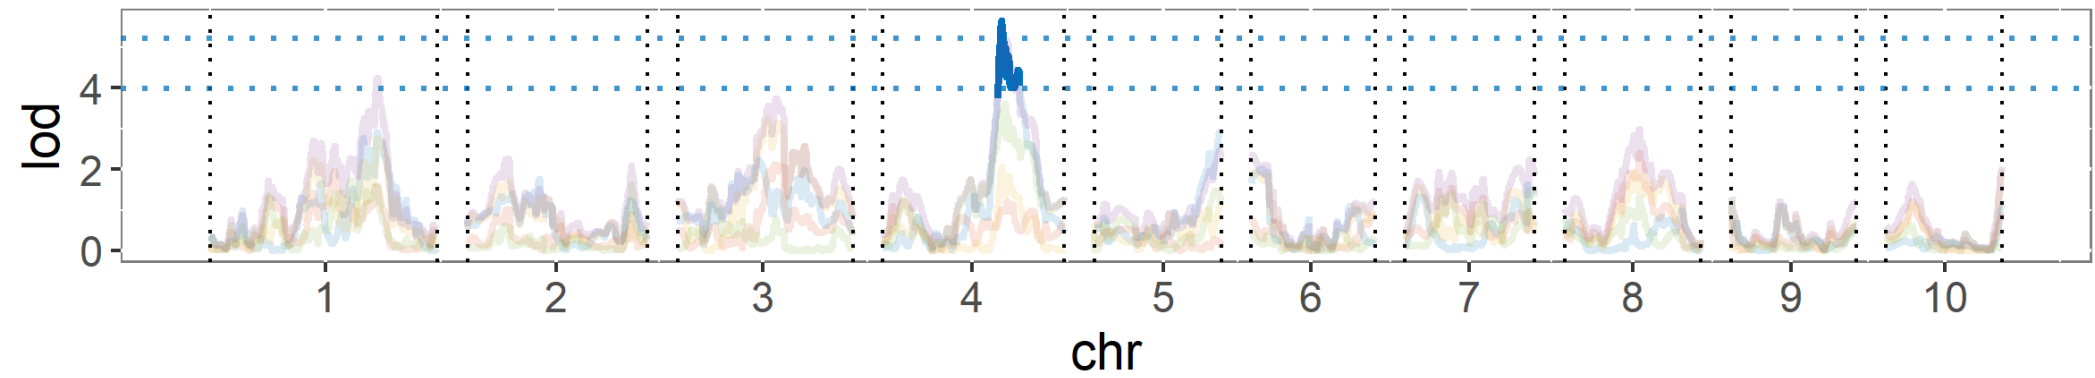

# ED

model H0wt H0hun Ha Hf Hi

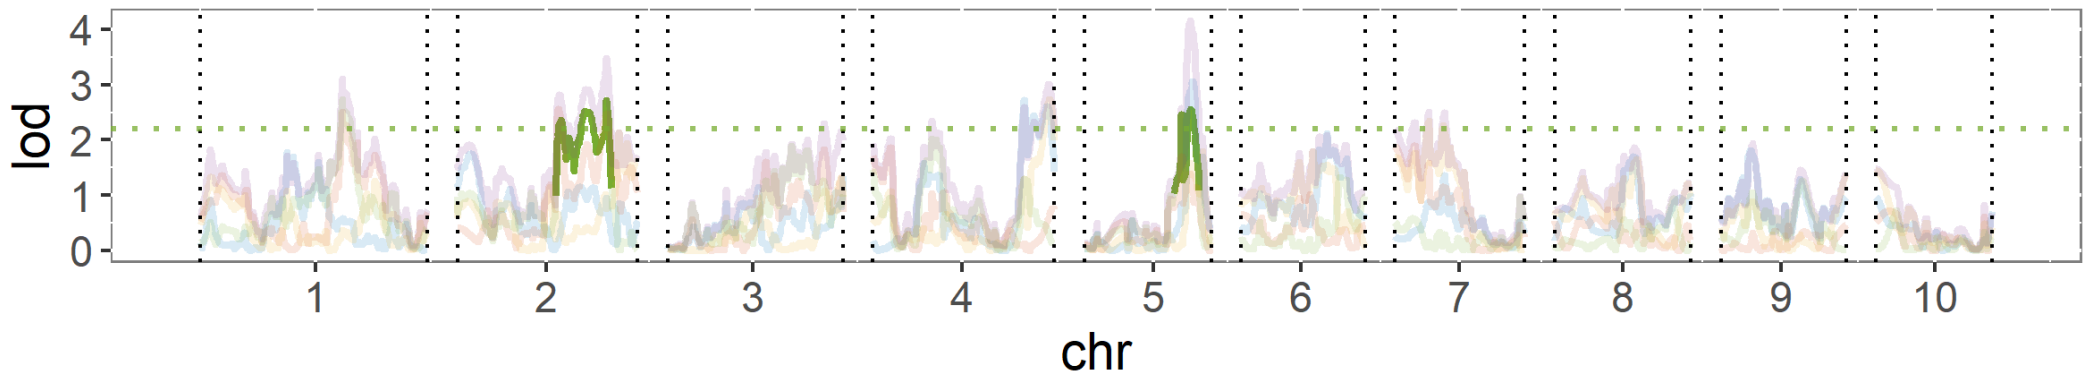

# EL

model — H0wt — H0hun — Ha — Hf — Hi

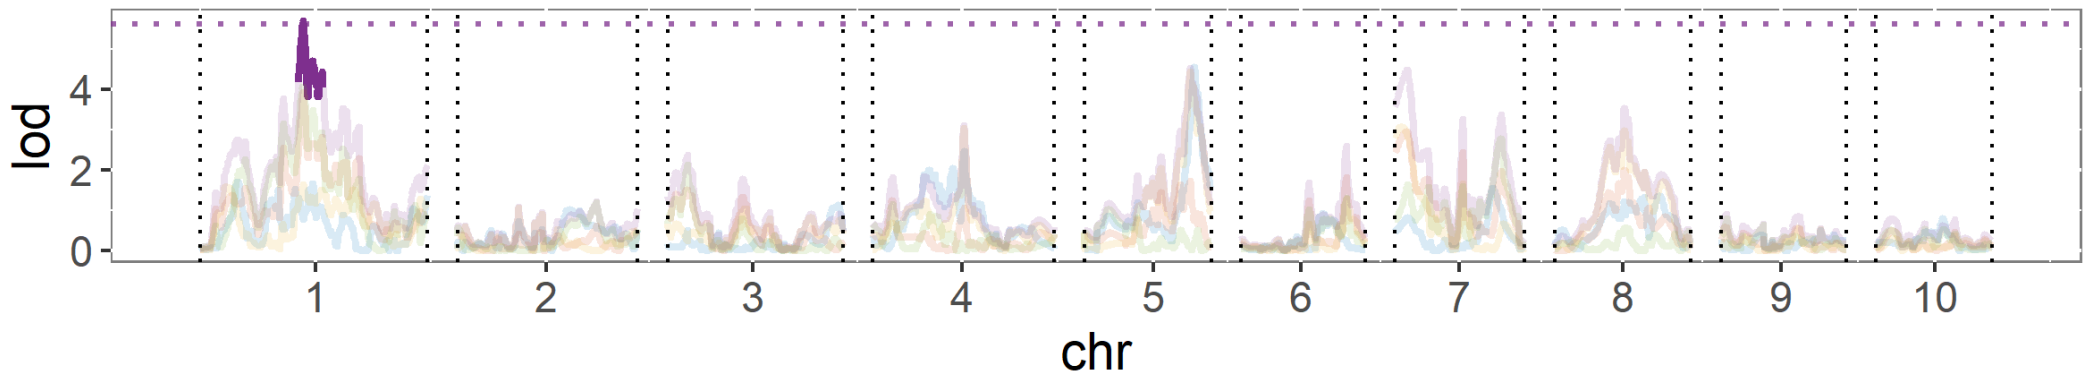

# EW

model H0wt H0hun Ha Hf Hi

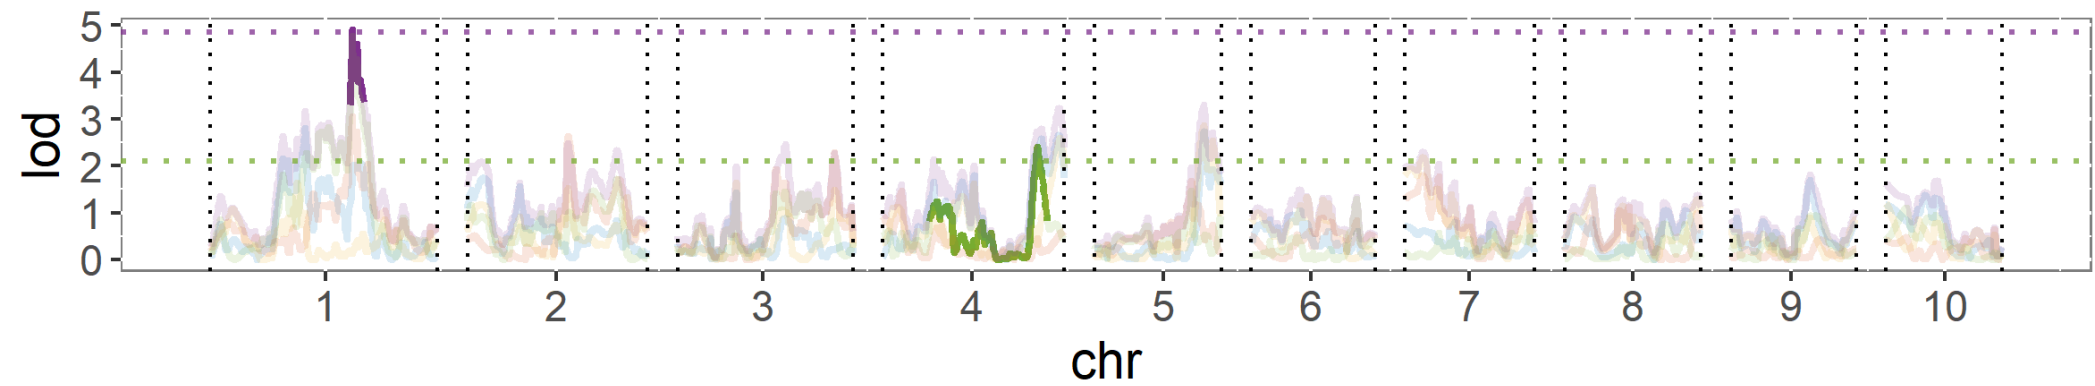

# FKW

model H0wt H0hun Ha Hf Hi

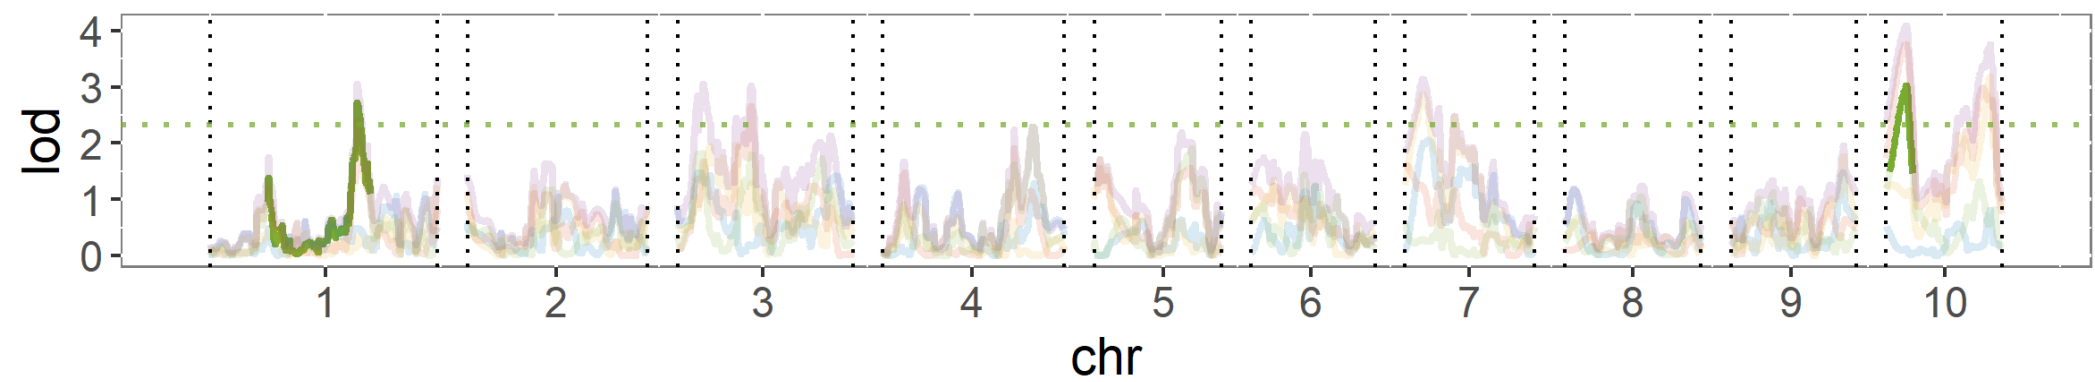

# GC

model H0wt H0hun Ha Hf Hi

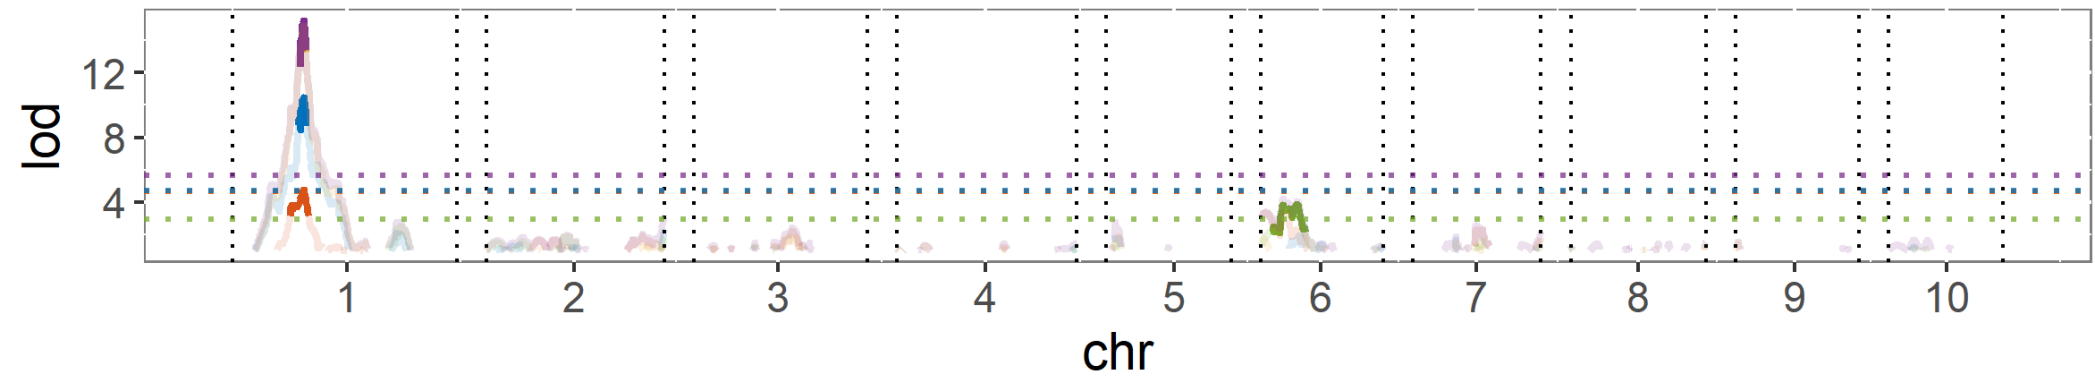

Supplement: fig3-data1 [file elife-61701-fig3-data1-v1.pdf]
