# Supplementary material for: The genetic architecture of host response reveals the importance of arbuscular mycorrhizae to maize cultivation
Source: eLife journal article supplement (doi:10.7554/elife.61701), 2020-11-19

**2\_206786561**

**4\_157509649**

**Genotype** ● CML ● HET ● W22

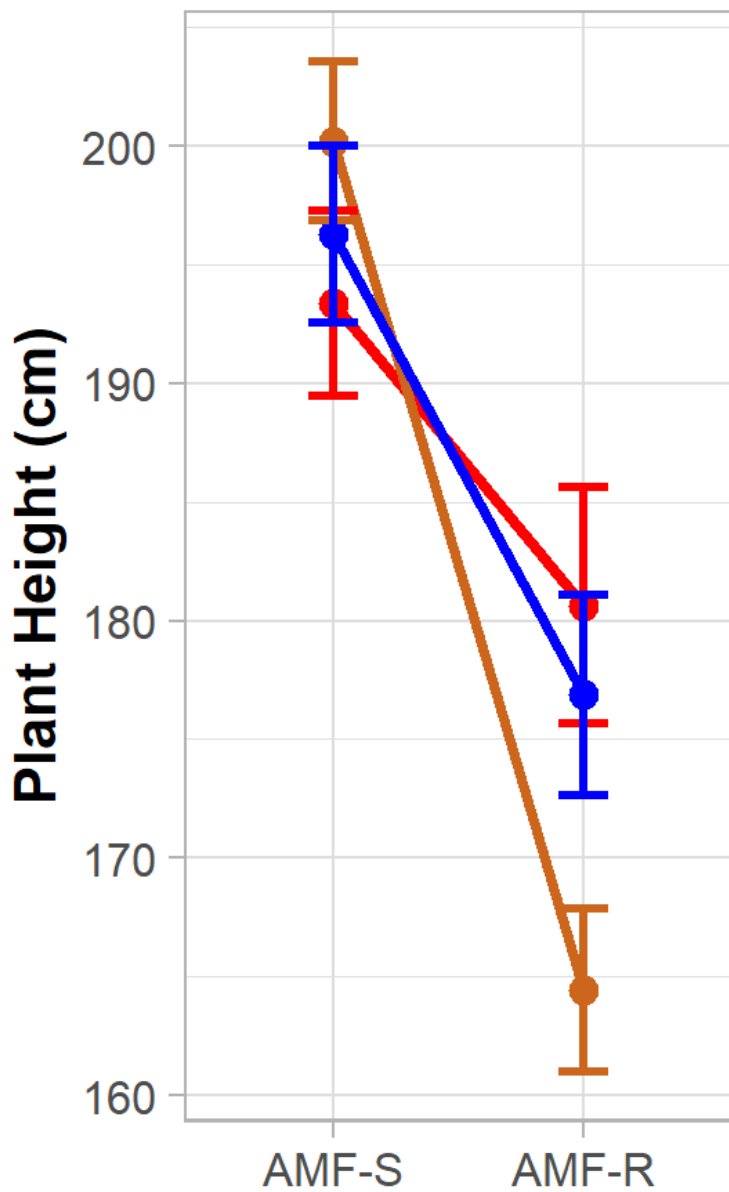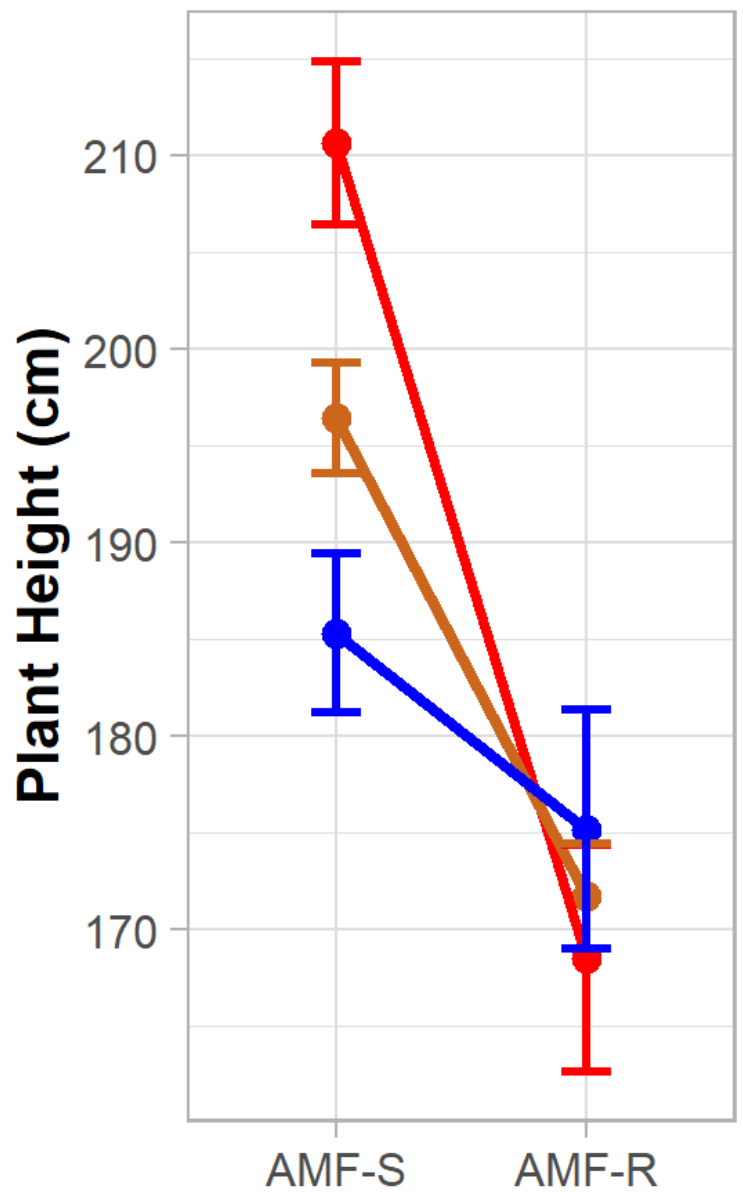

**5\_172855146**

**7\_10168414**

**Genotype** ● CML ● HET ● W22

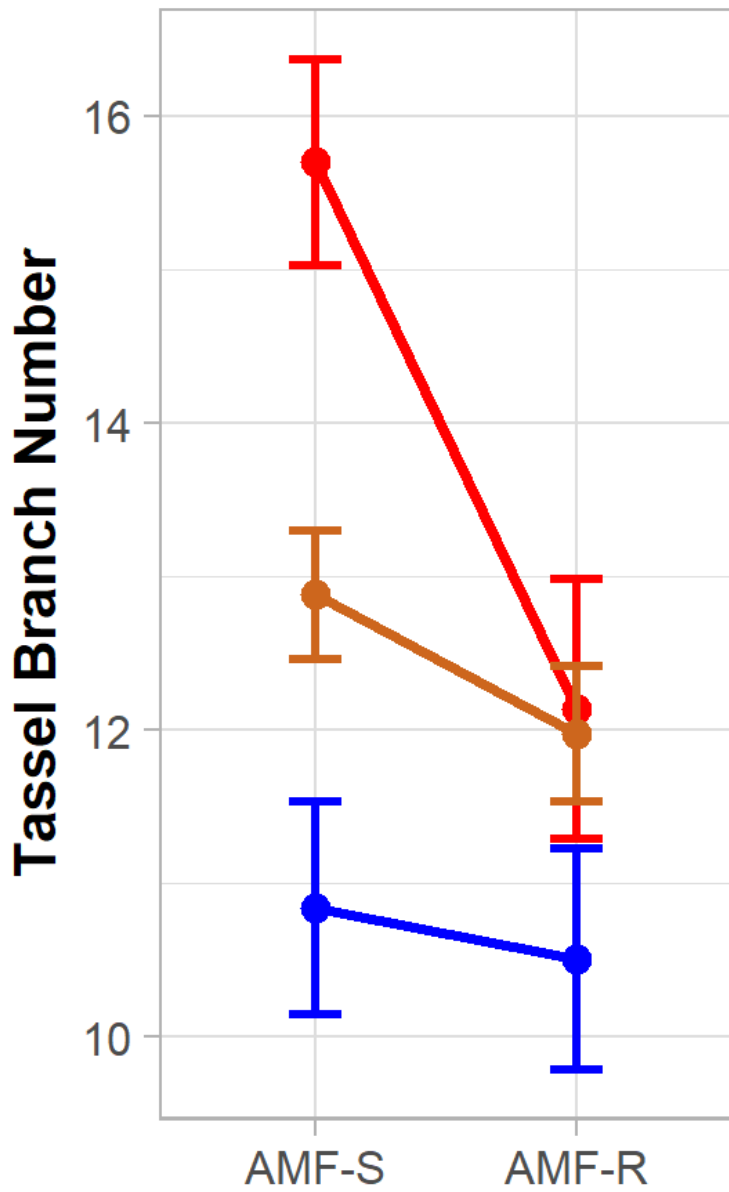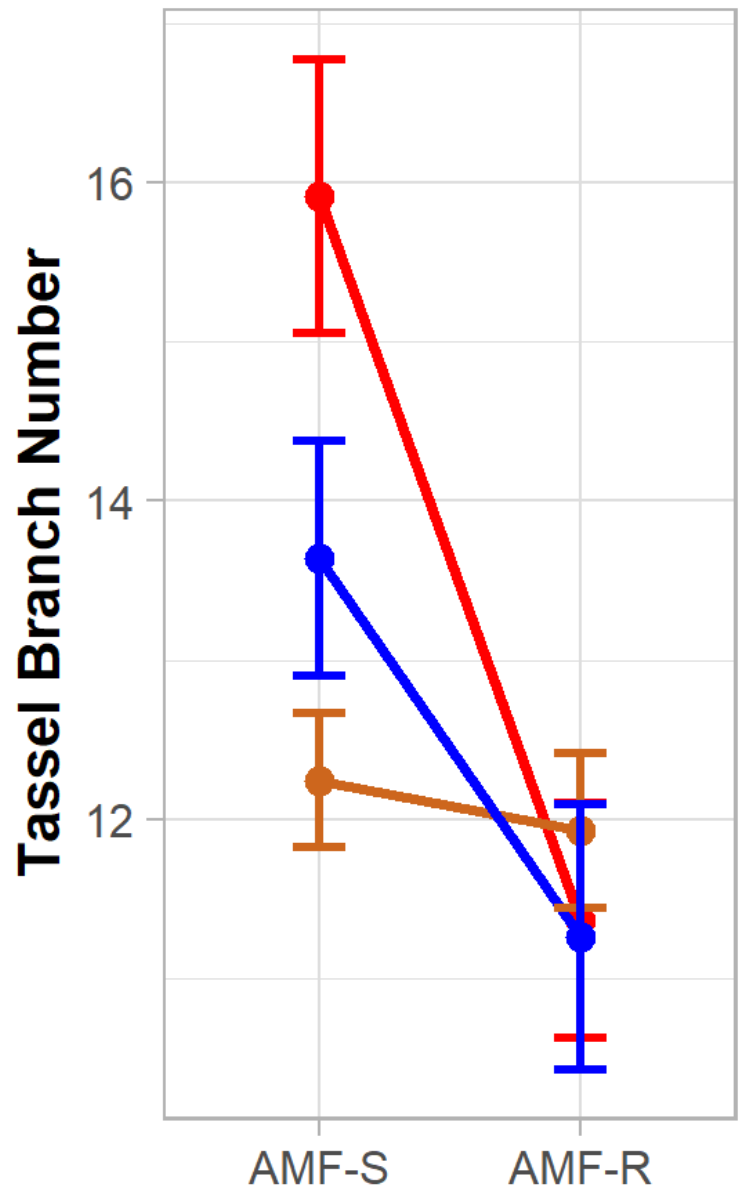

# 1\_210043371

**Genotype** ● CML ● HET ● W22

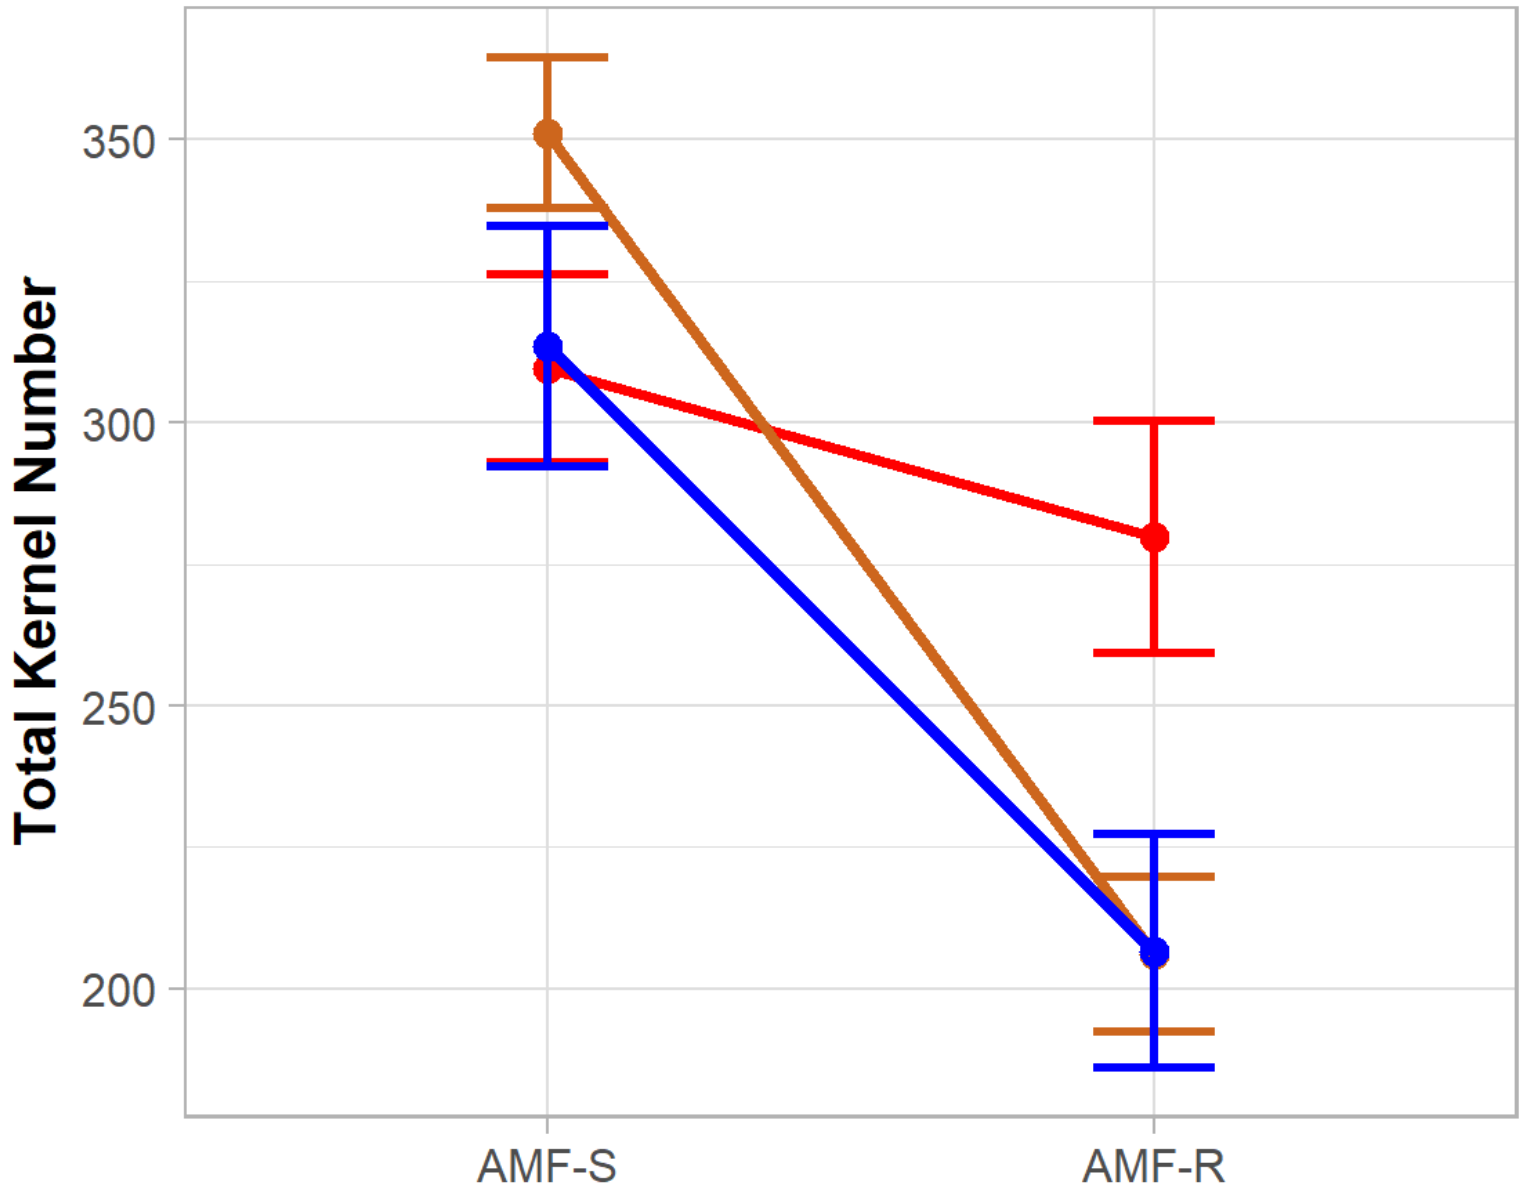

# 1\_210043371

**Genotype**    ● CML    ● HET    ● W22

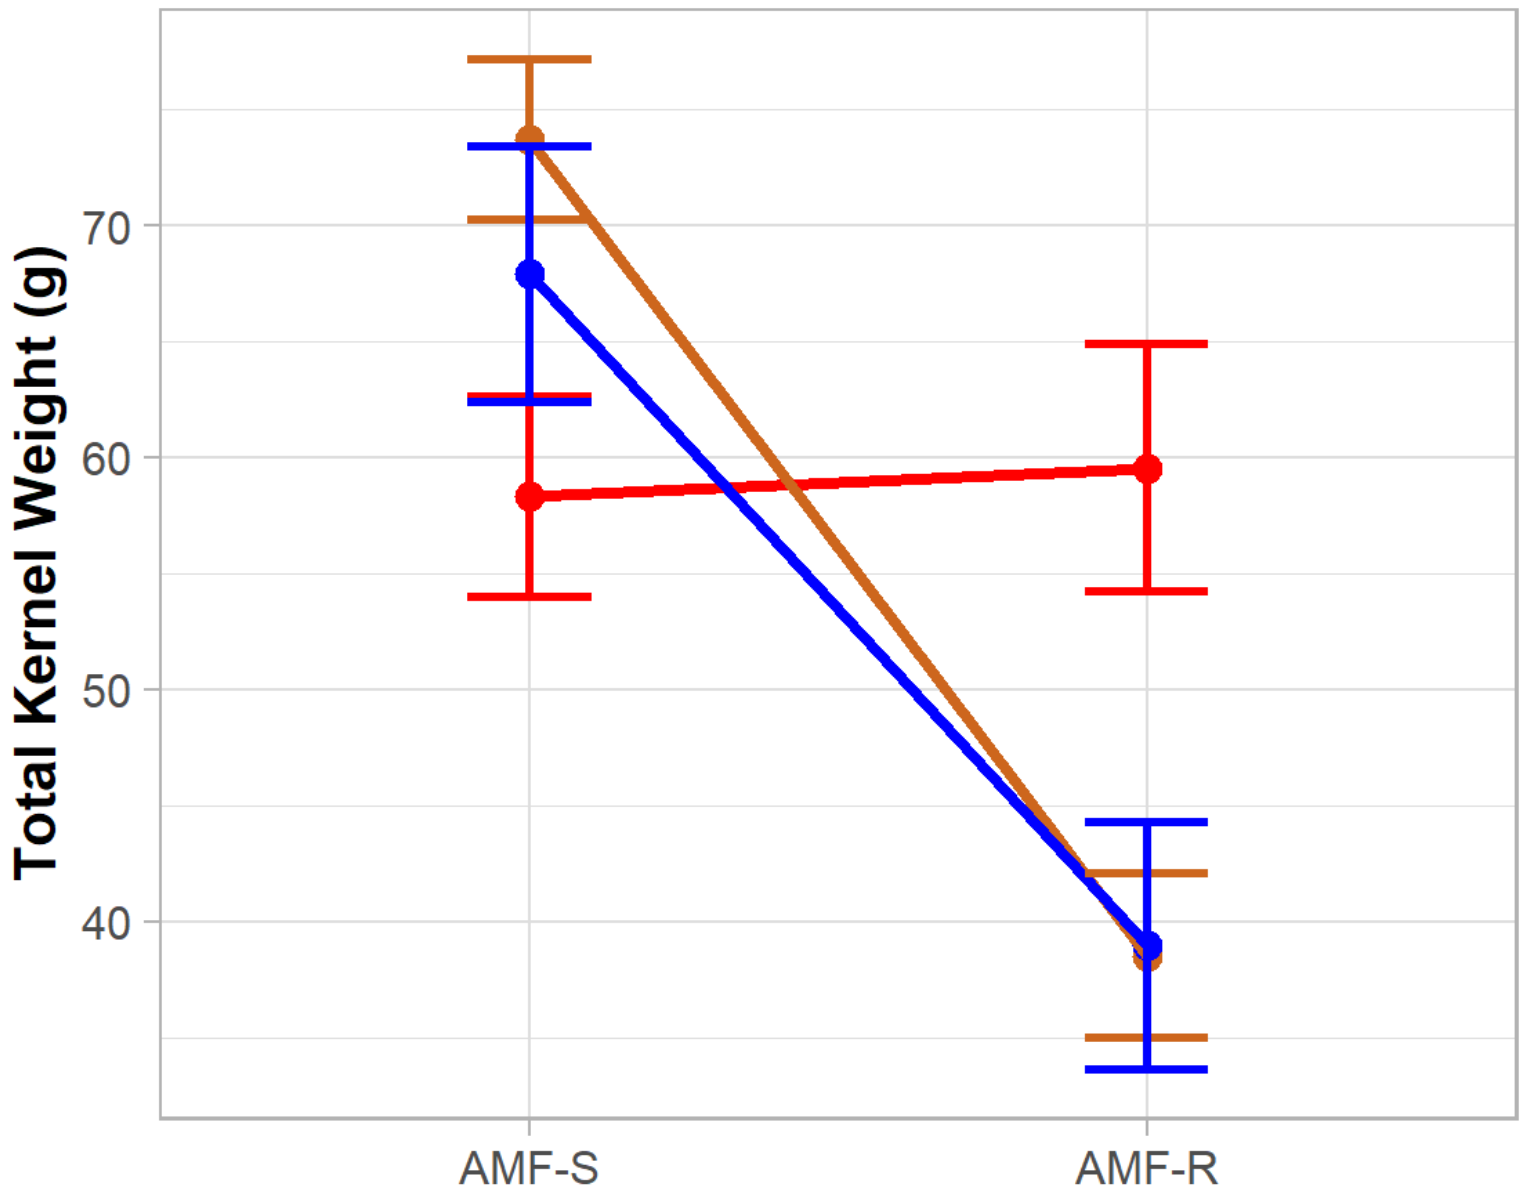

# 8\_169413054

**Genotype**    ● CML    ● HET    ● W22

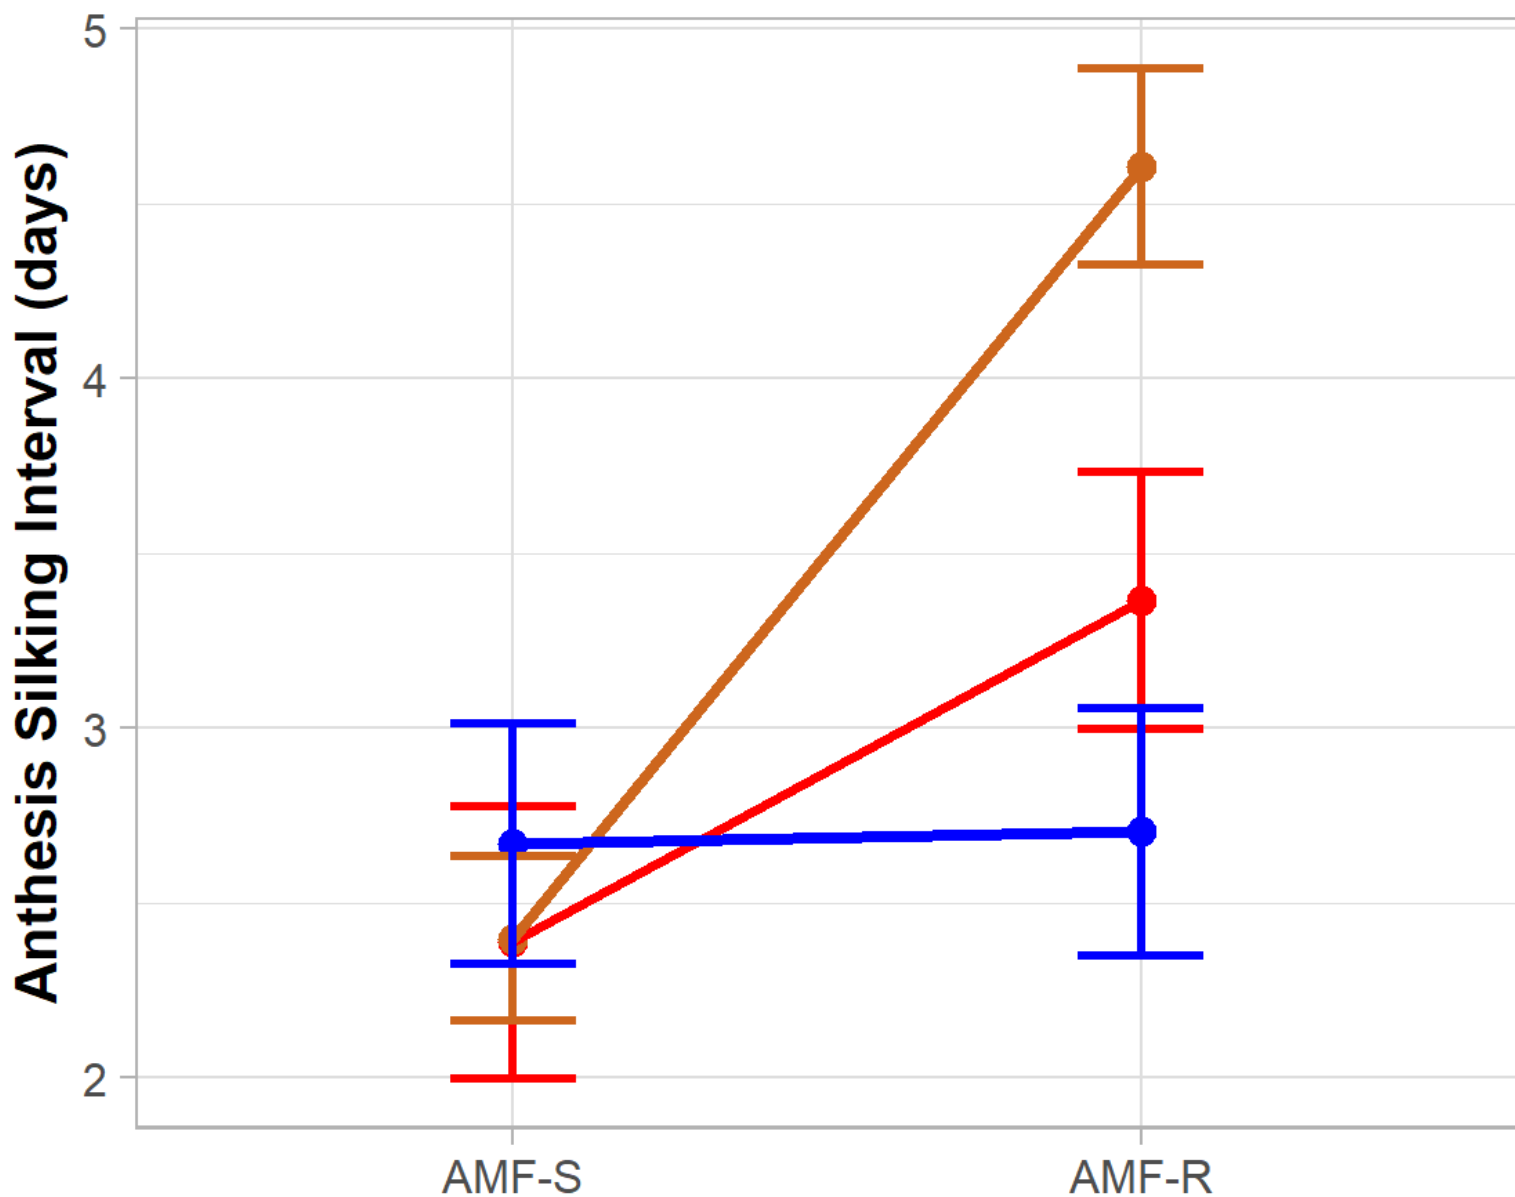

# 4\_182468257

**Genotype**   ● CML   ● HET   ● W22

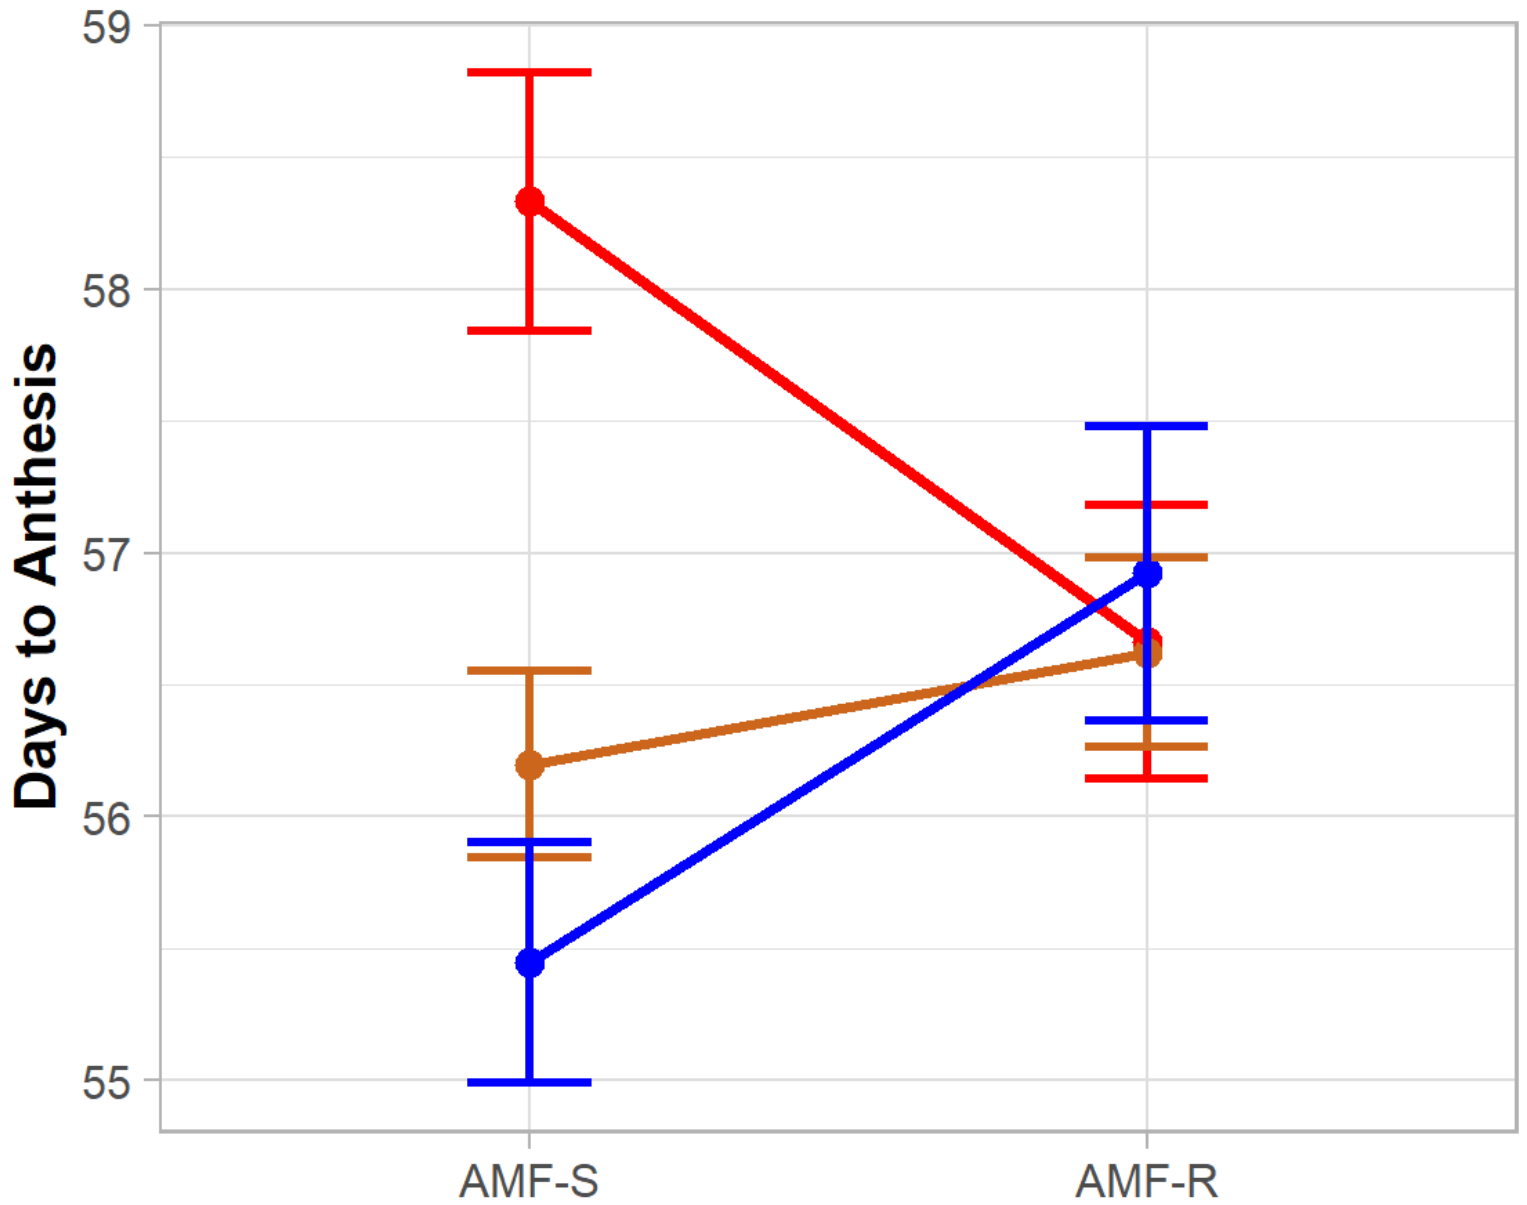

# 4\_182468257

**Genotype** CML HET W22

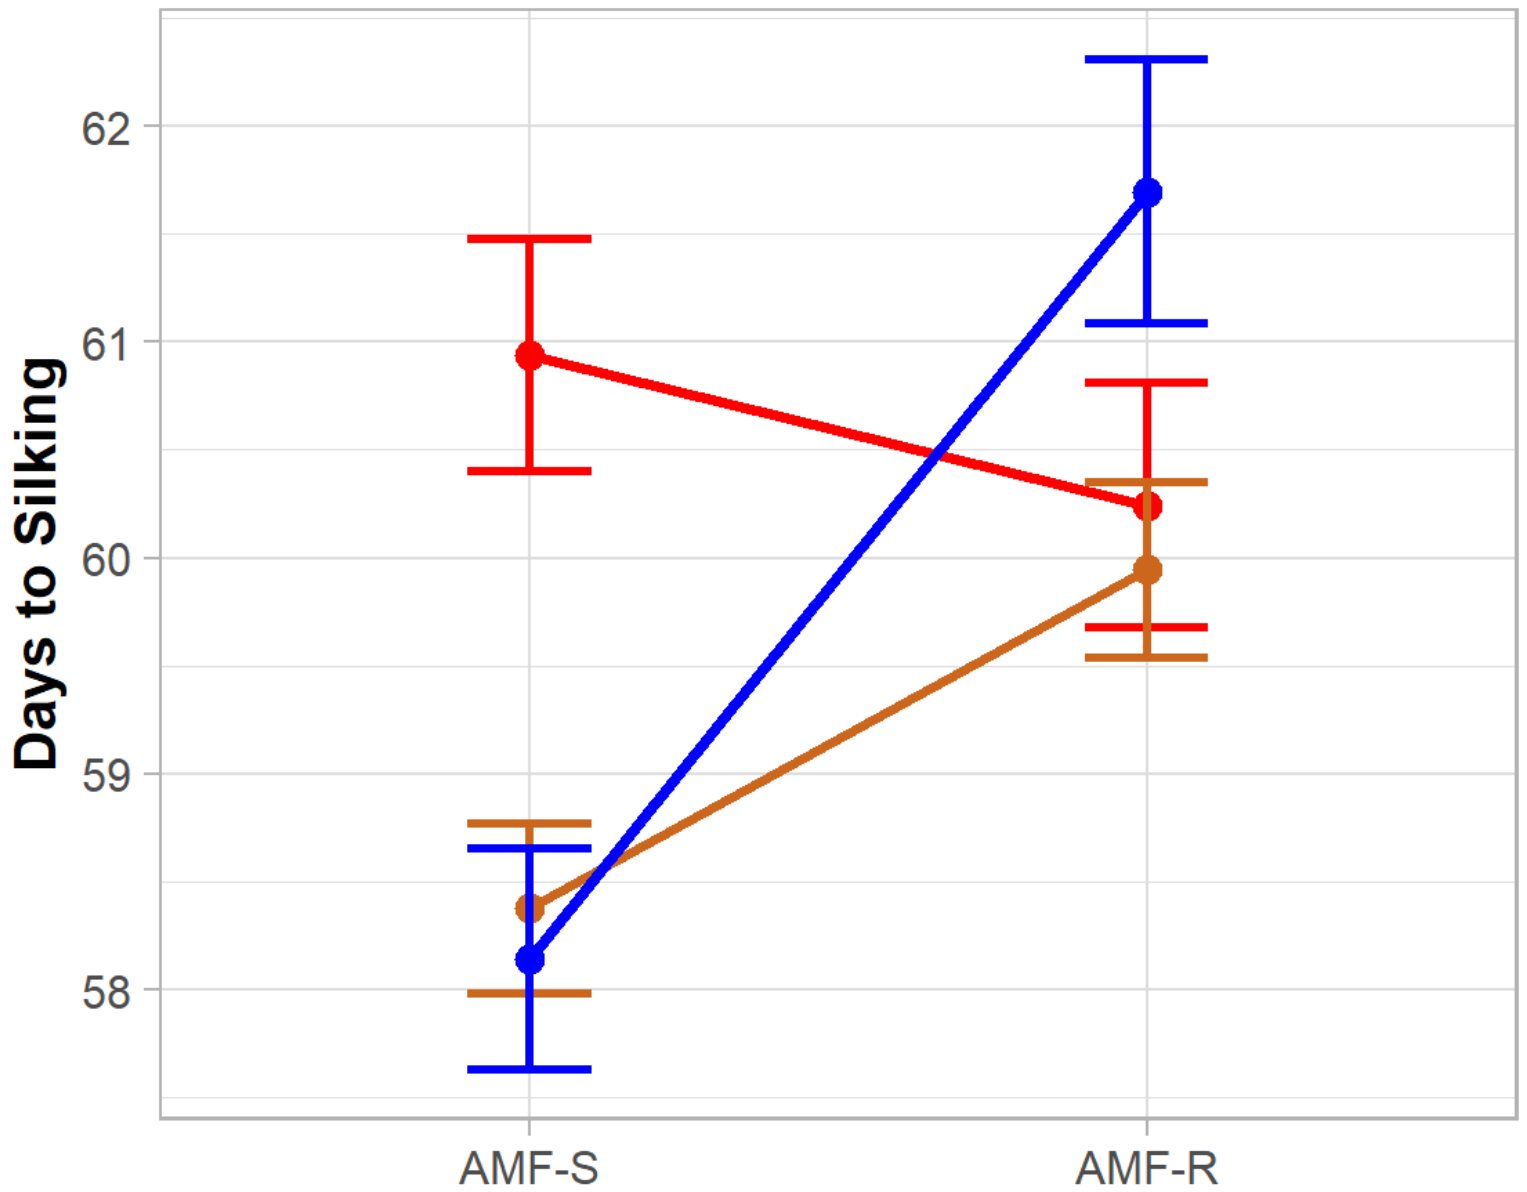

2\_224844622

5\_190295610

Genotype CML HET W22

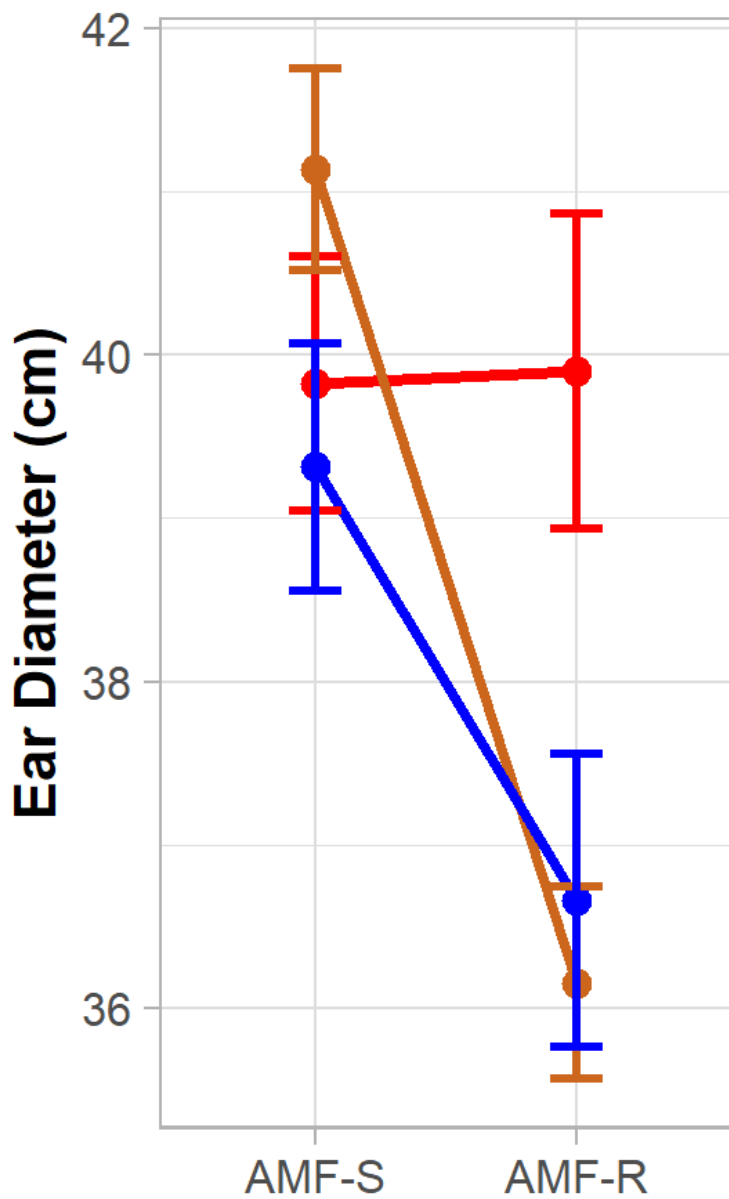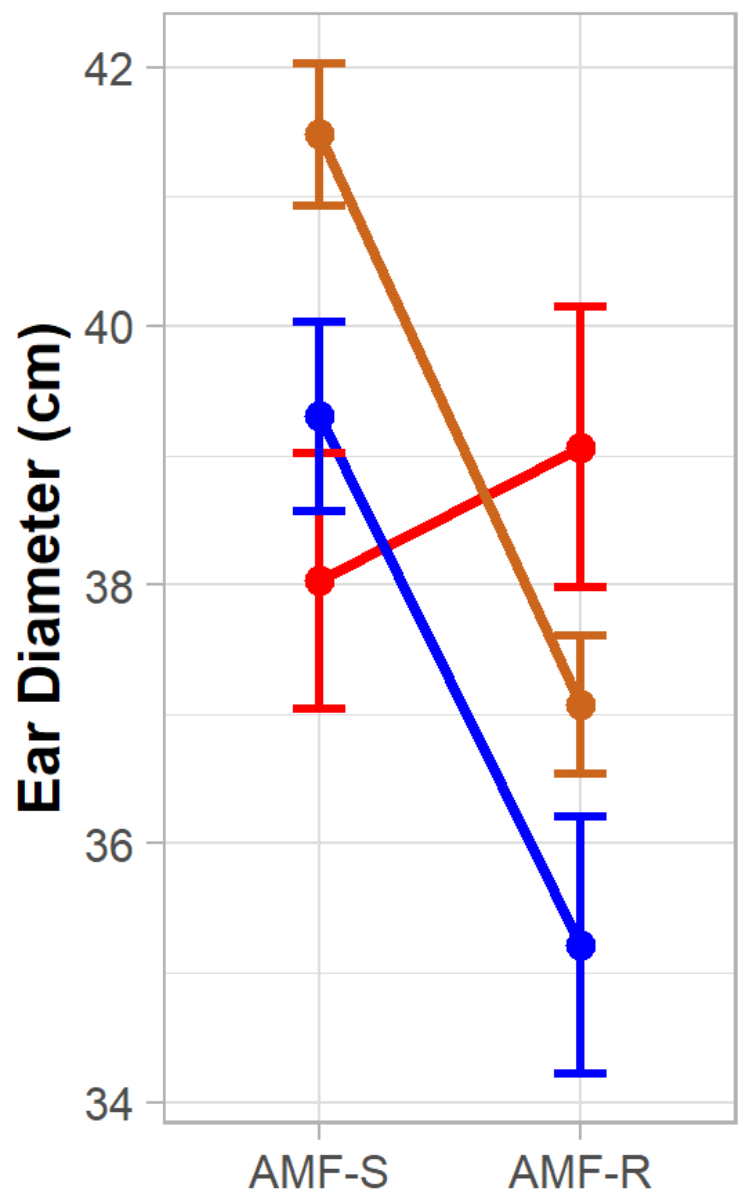



# 1\_110990465

**Genotype**    ● CML    ● HET    ● W22

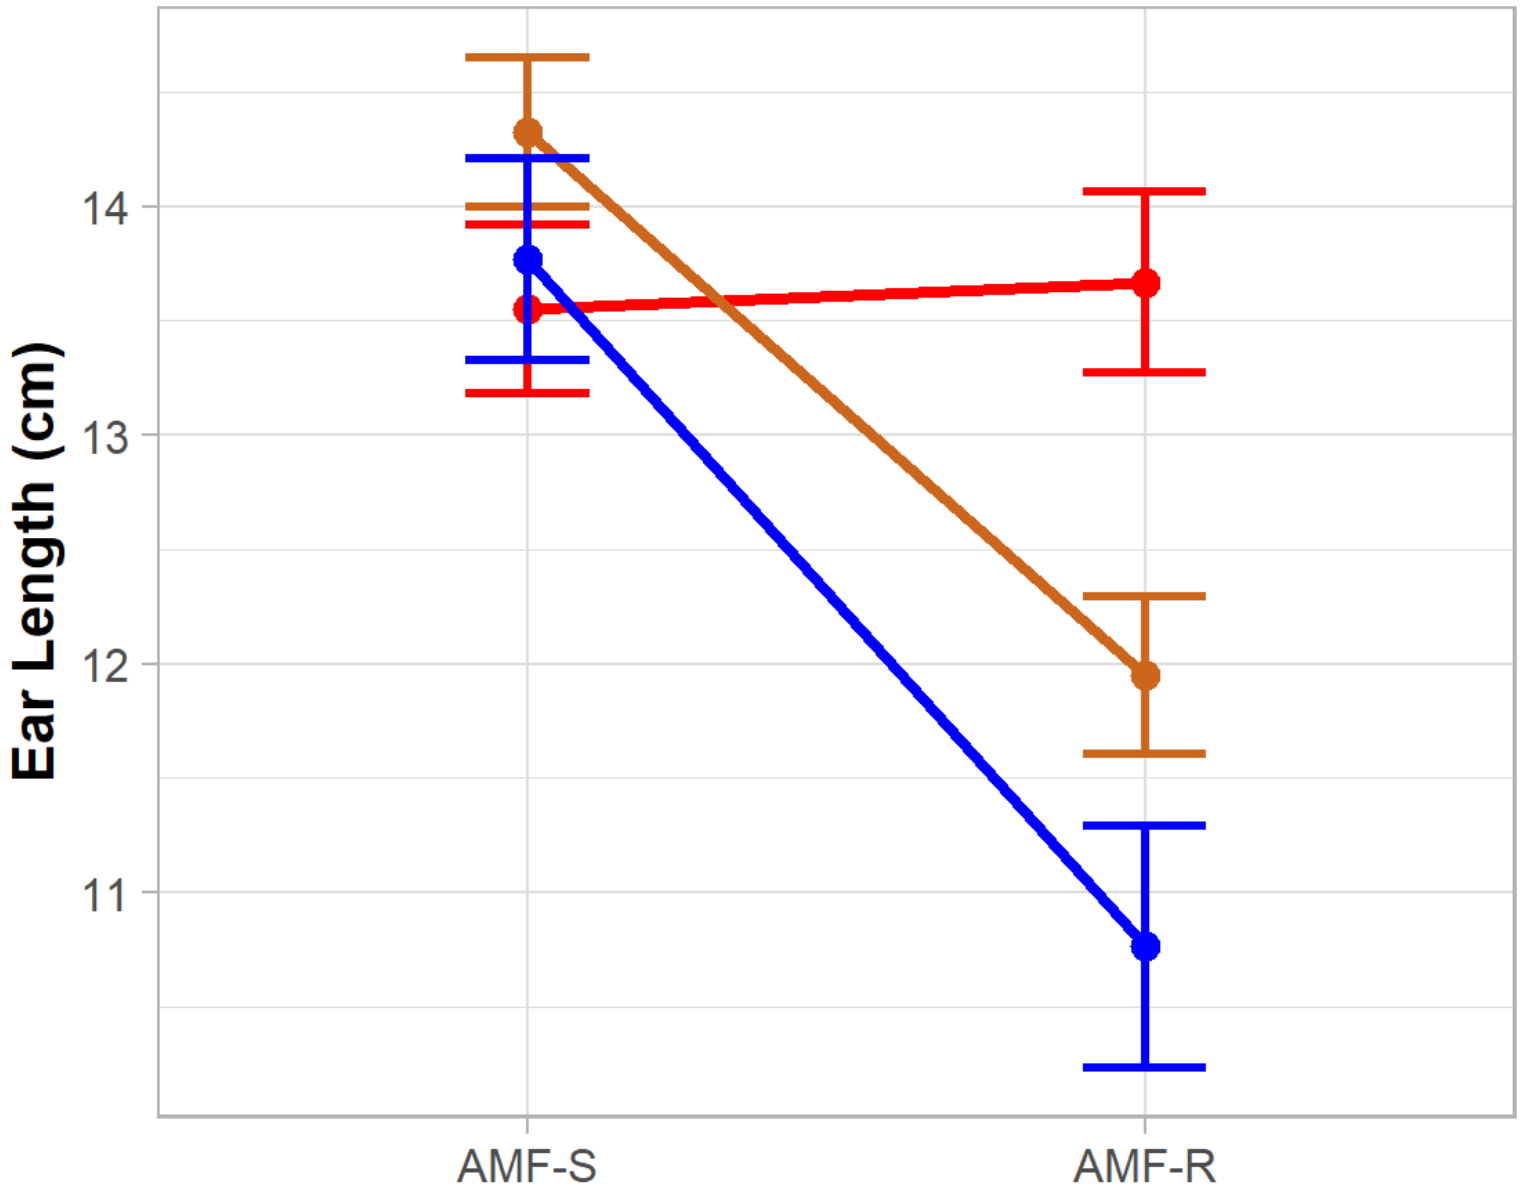

1\_210043371

4\_238062250

Genotype CML HET W22

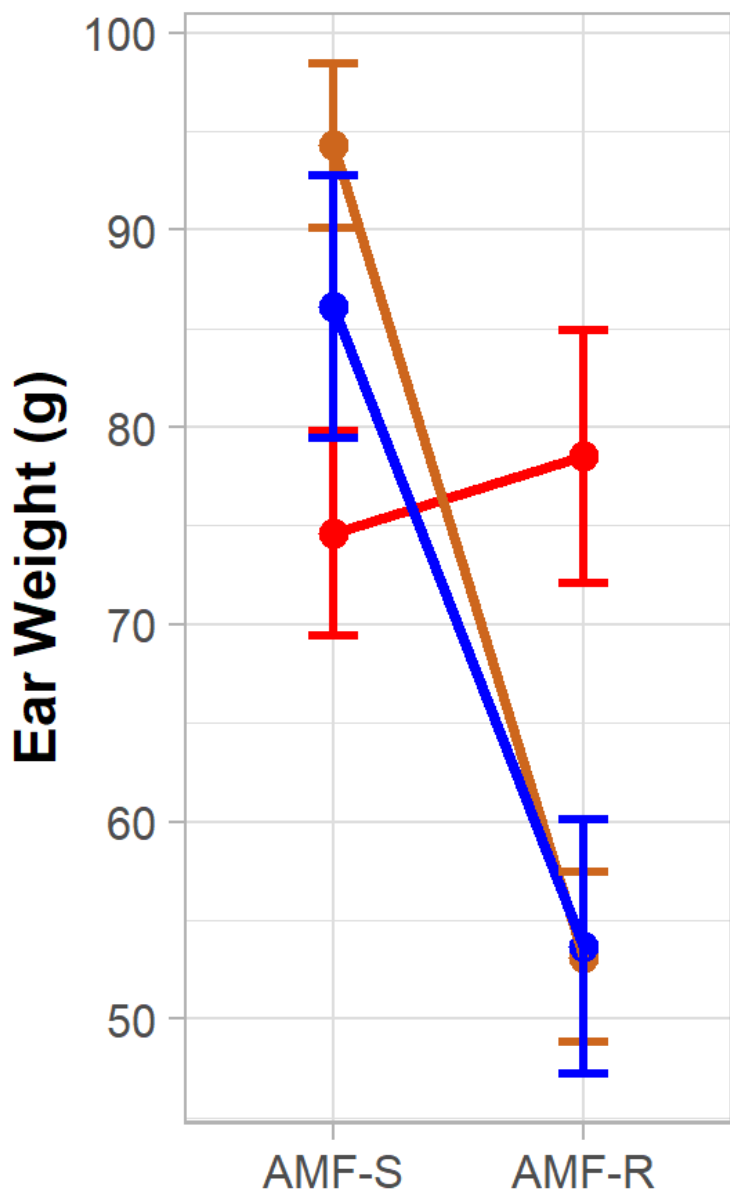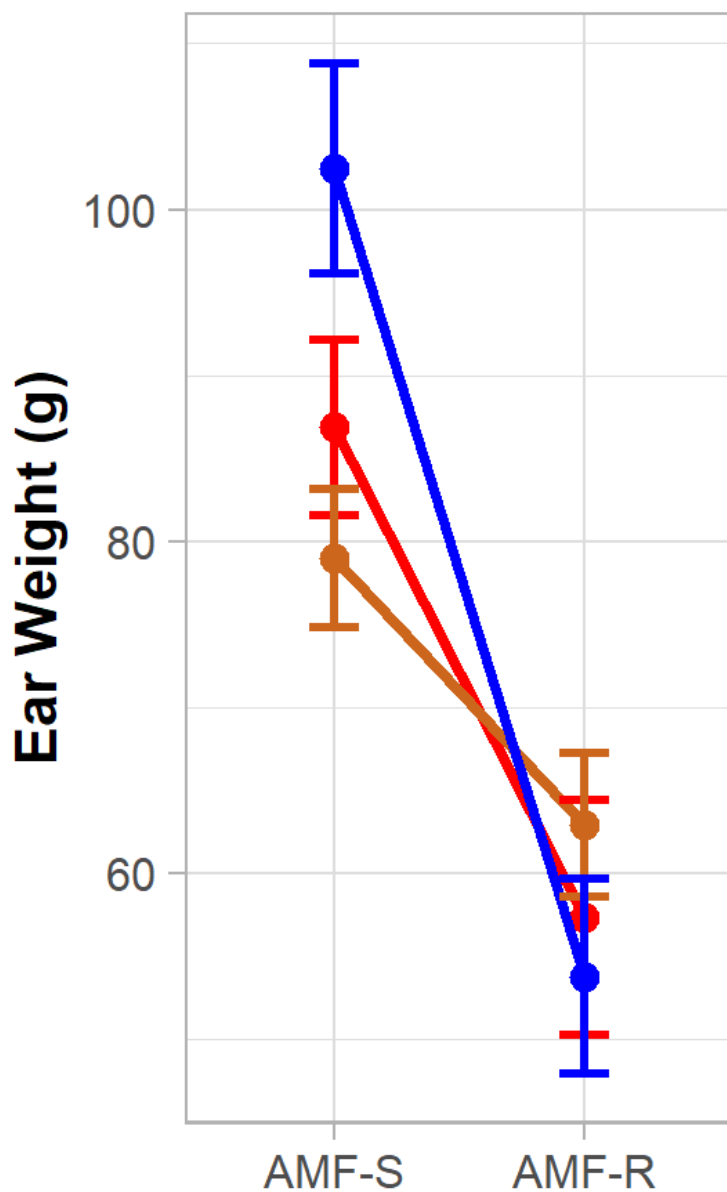

1\_217950619

10\_4697245

Genotype CML HET W22

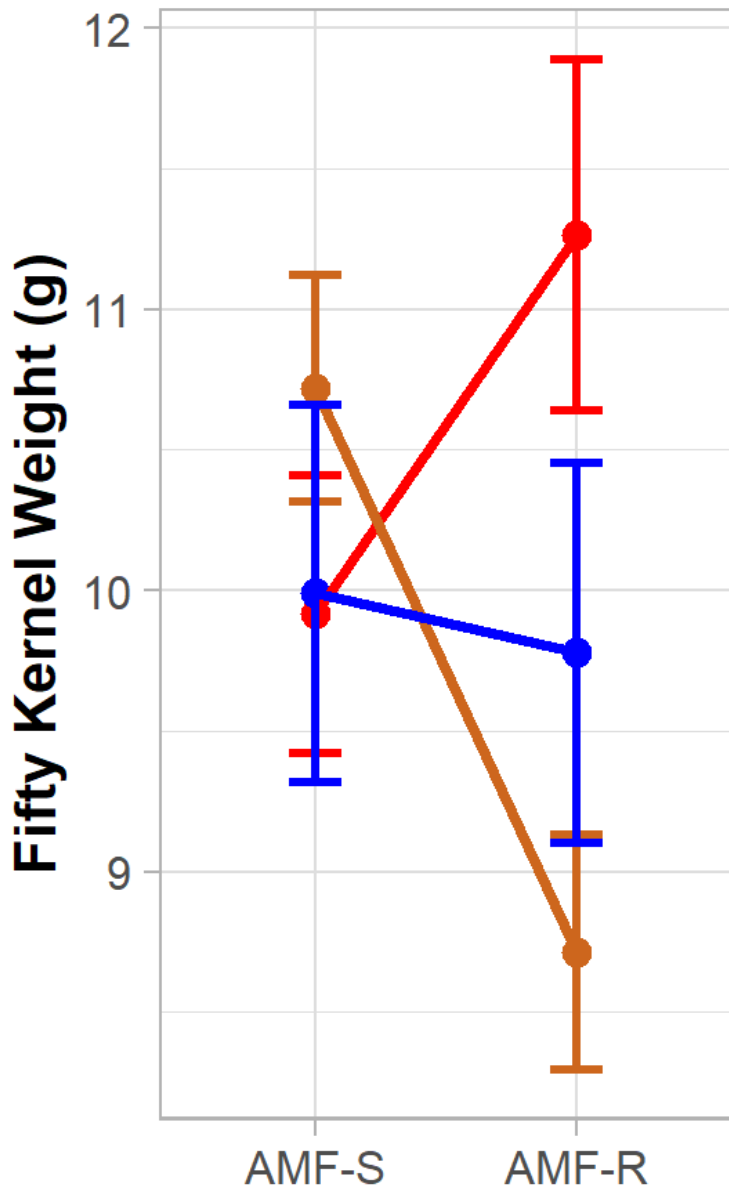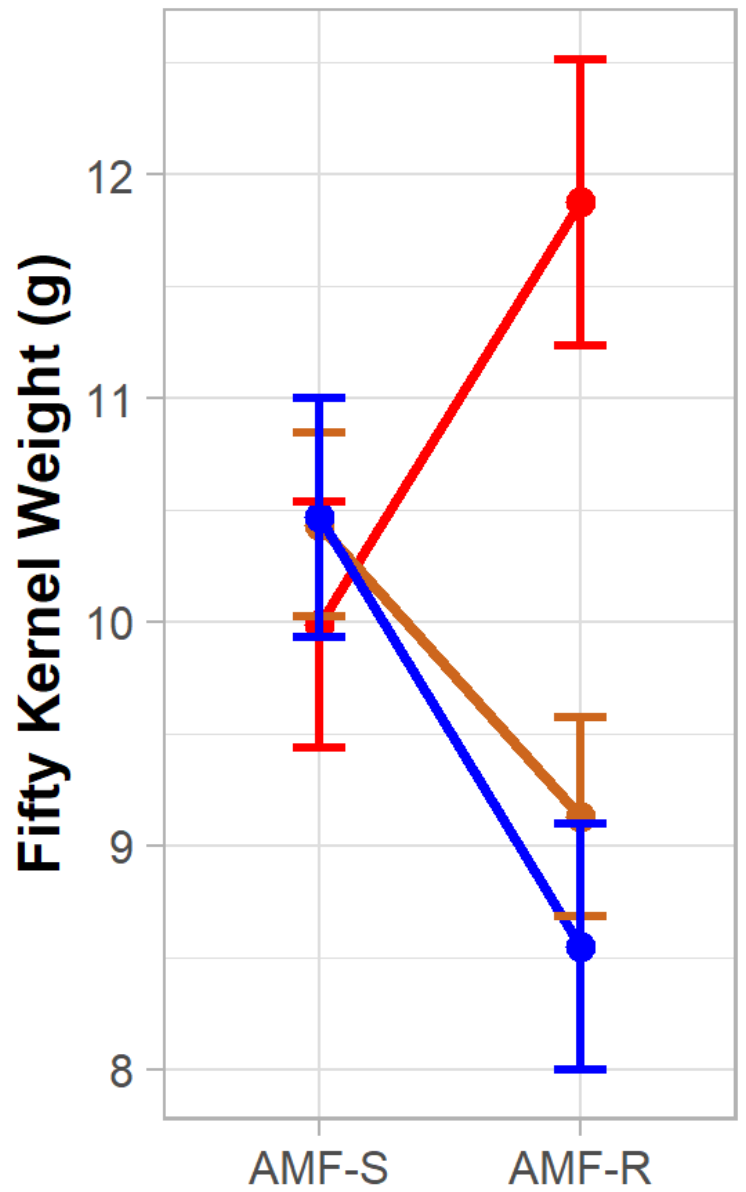

**Marker 1\_217950619**

**Marker 10\_4697245**

**Genotype** ● CML ● HET ● W22

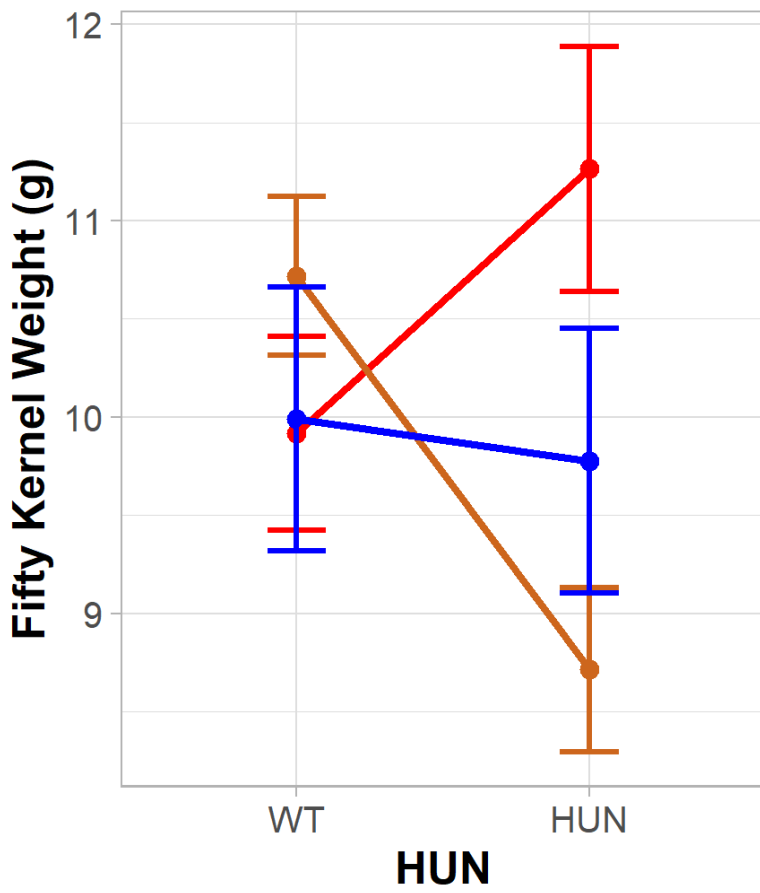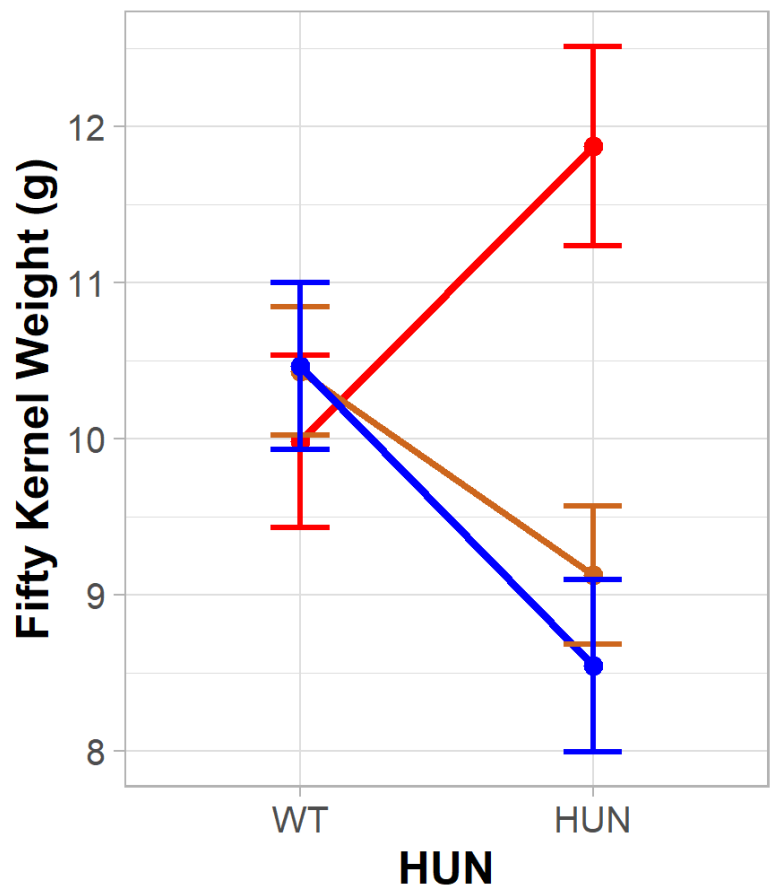

# 1\_45791478

**Genotype** CML312 HET W22

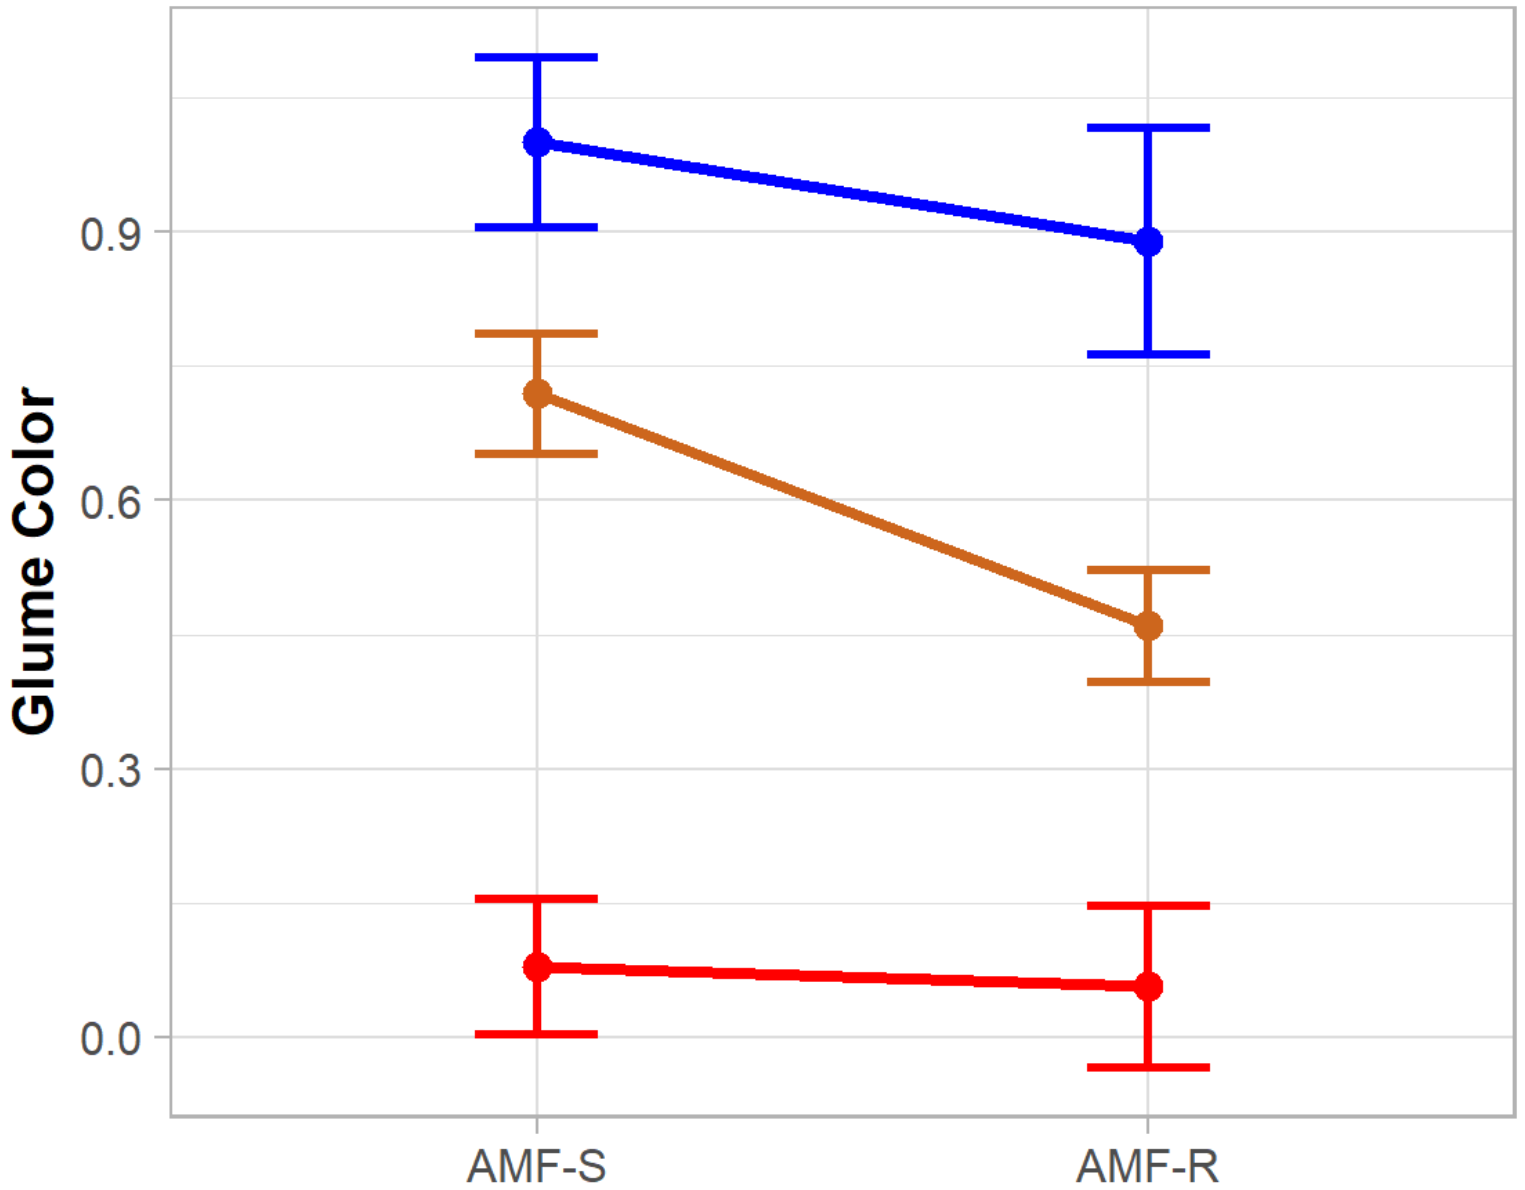

# 10\_139696184

**Genotype** CML312 HET W22

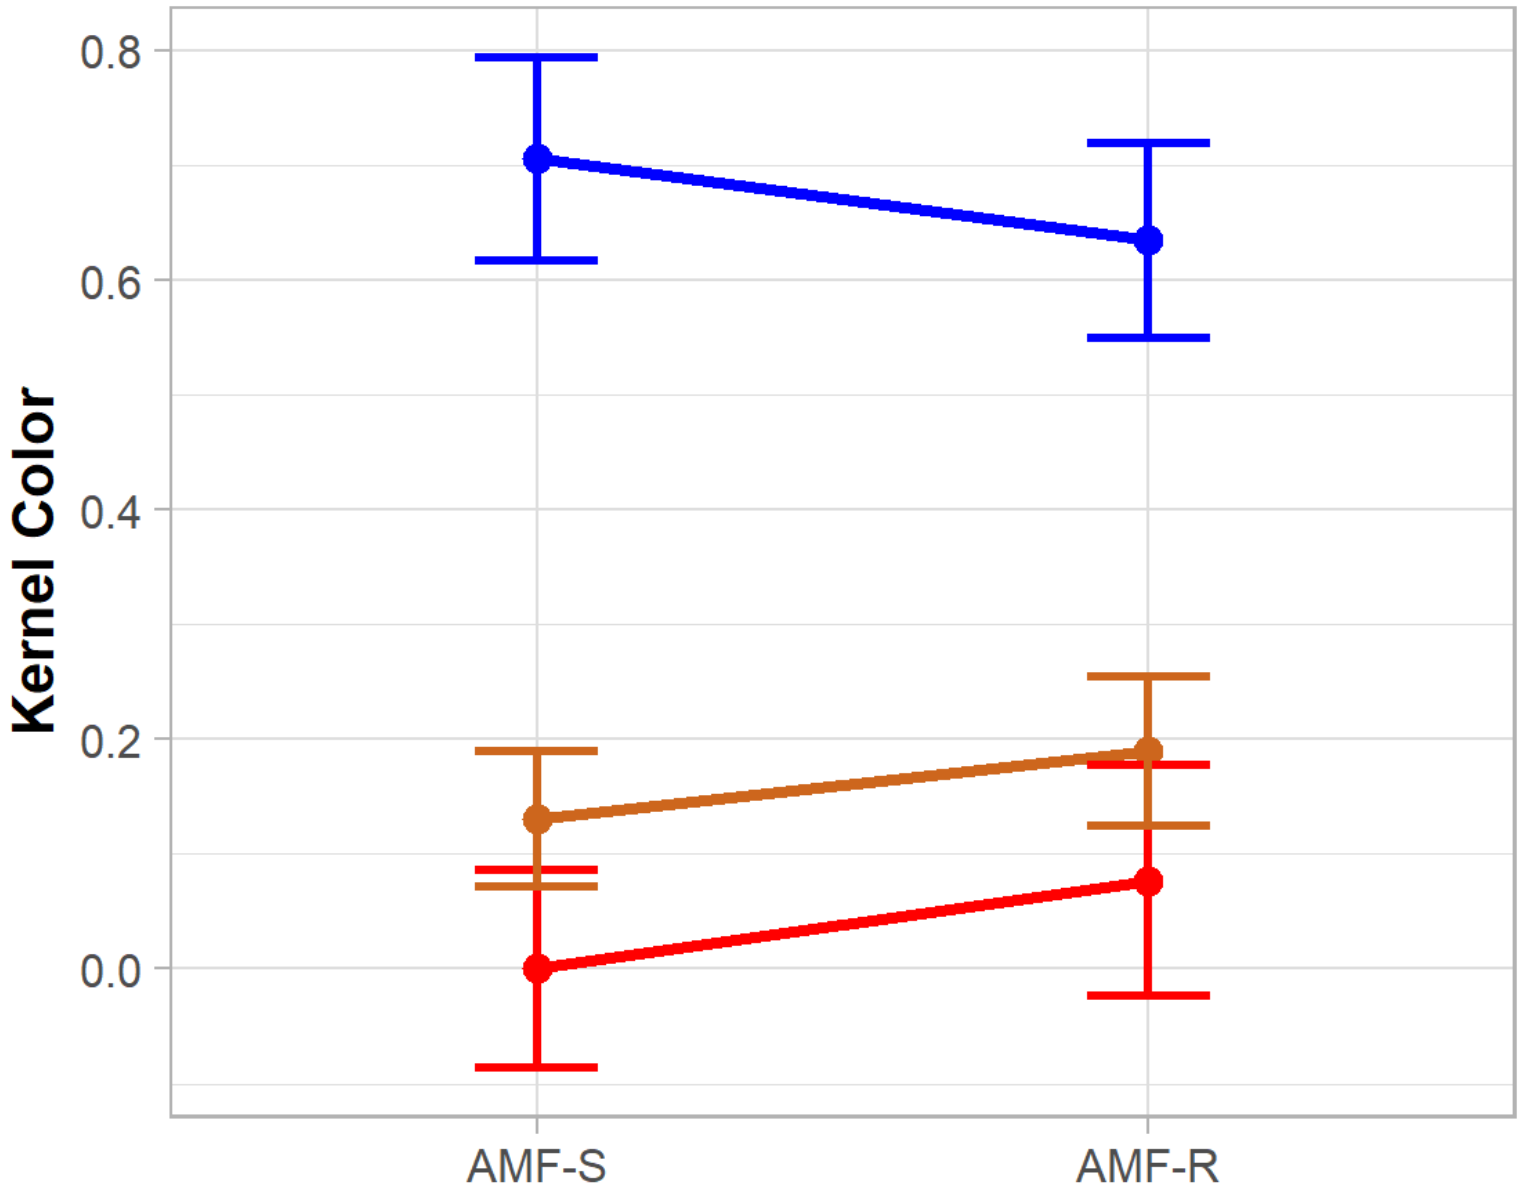

1\_210043371

7\_117576351

Genotype CML HET W22

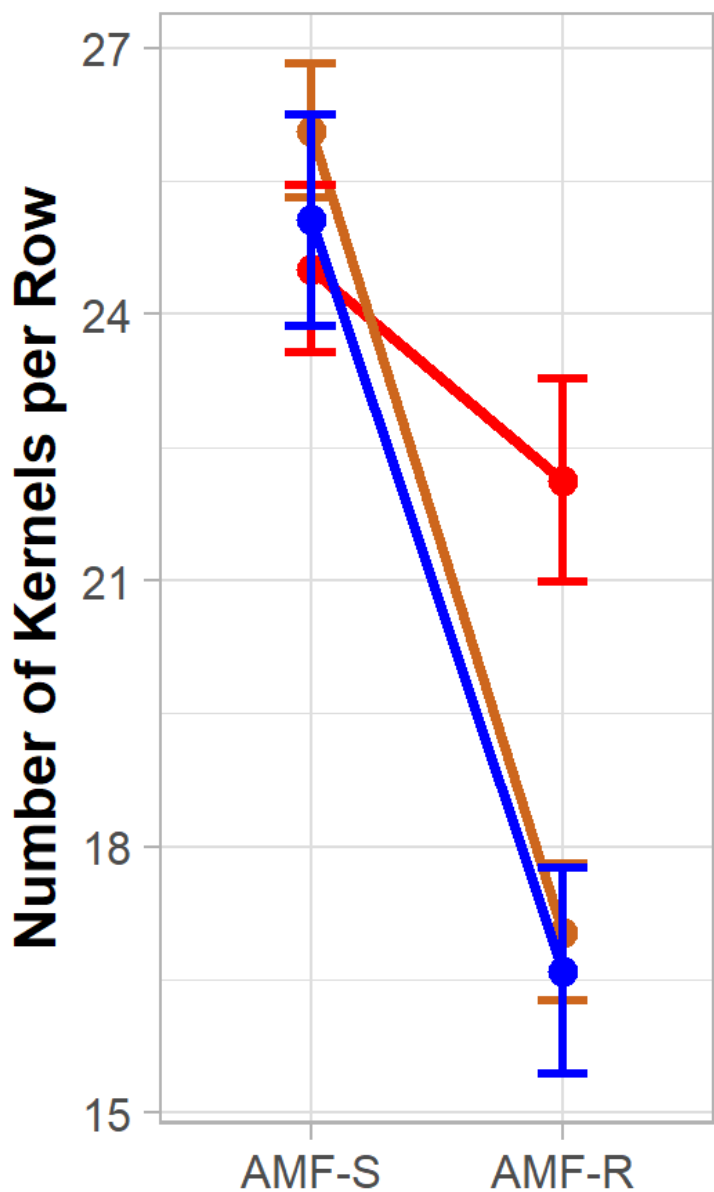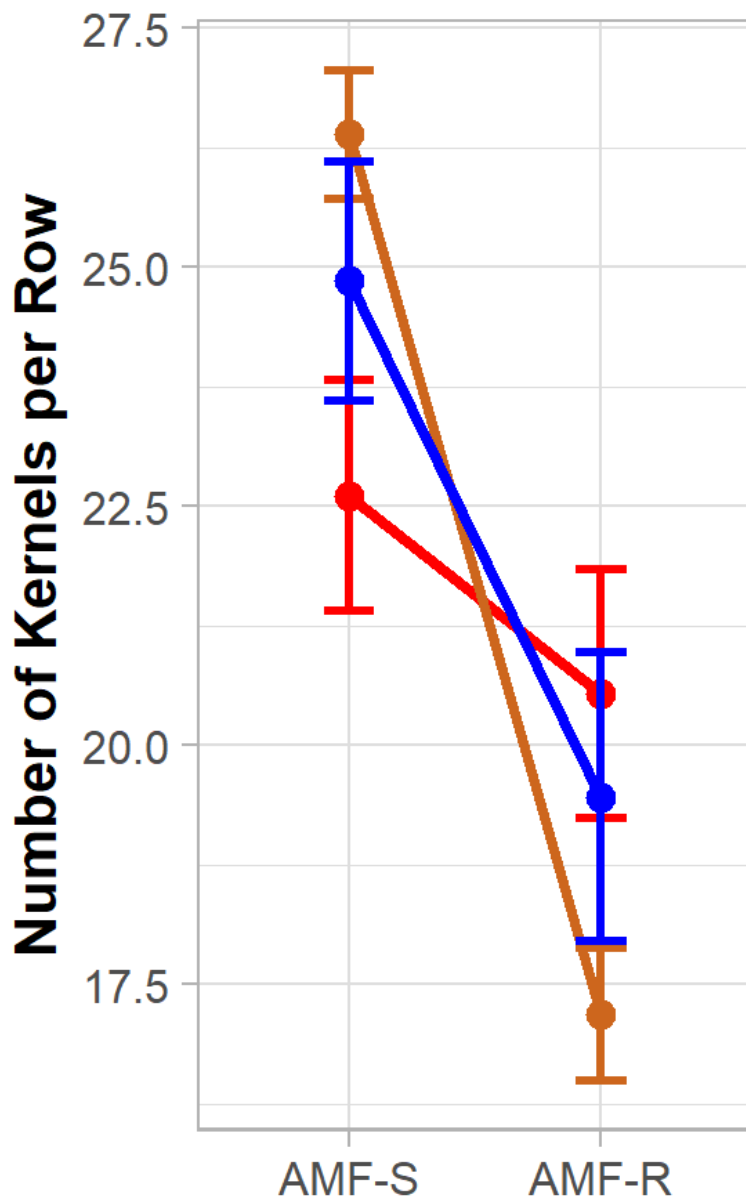

# 2\_17553181

**Genotype** CML HET W22

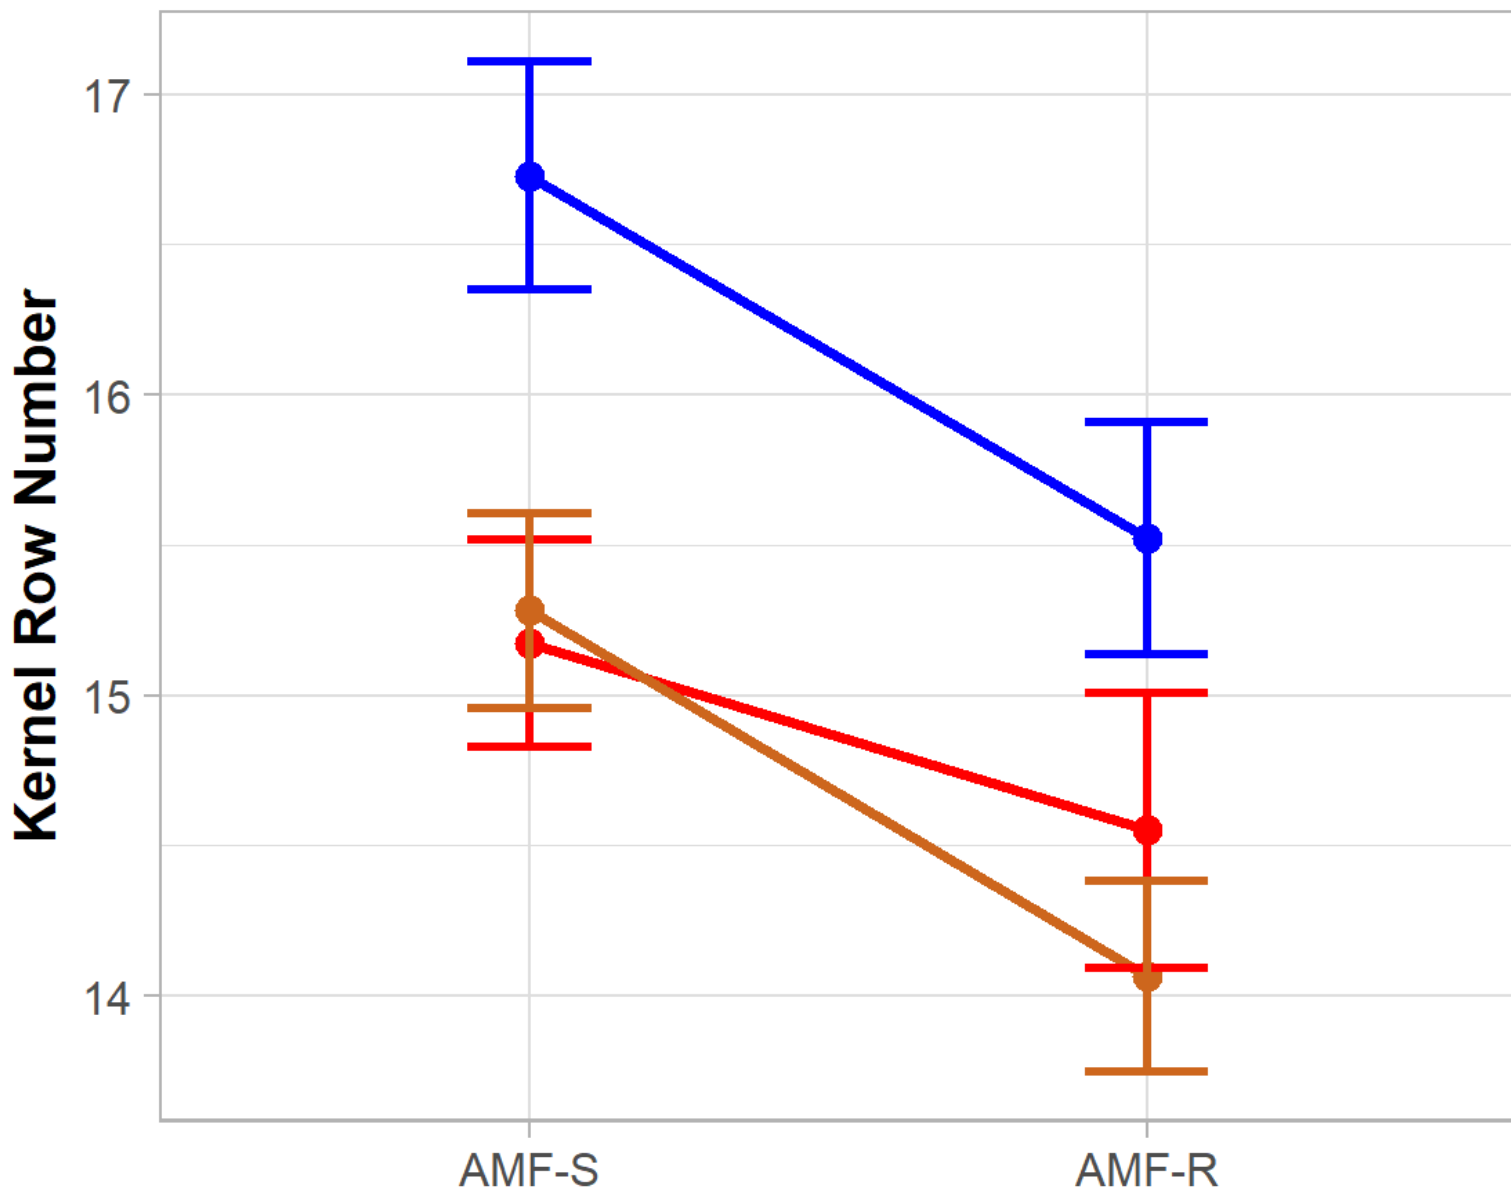



1\_45791478

10\_139696184

Genotype ● CML312 ● HET ● W22

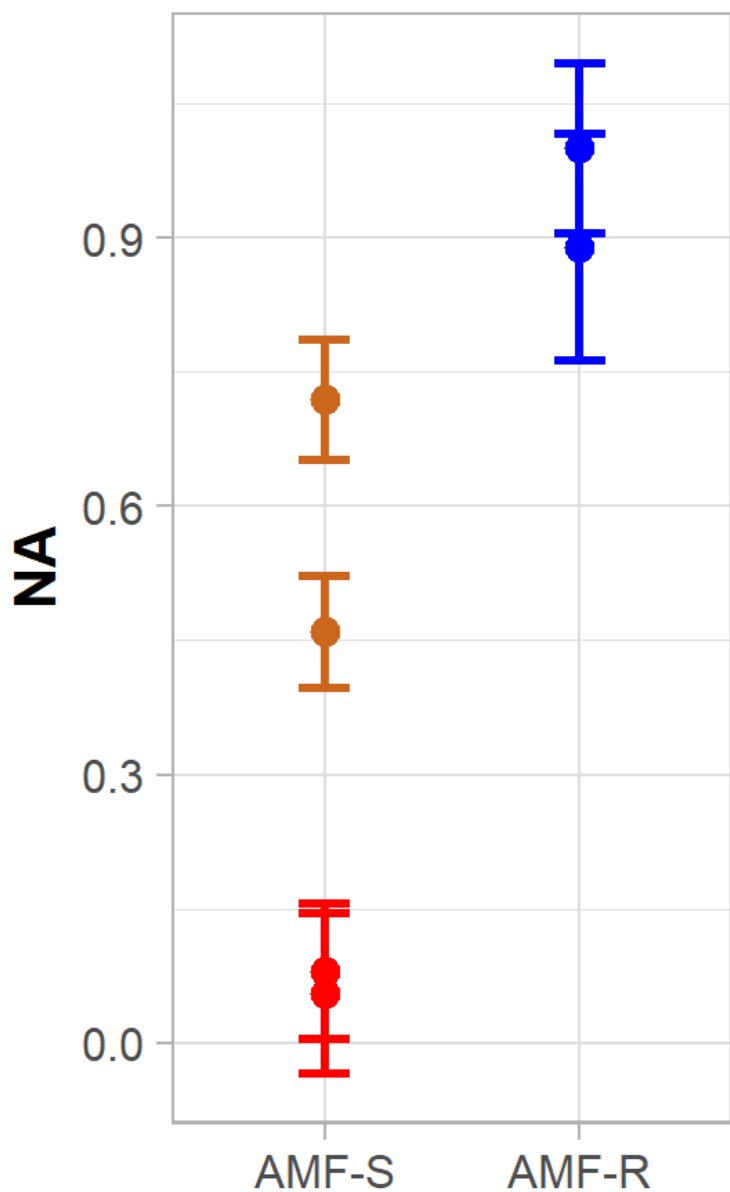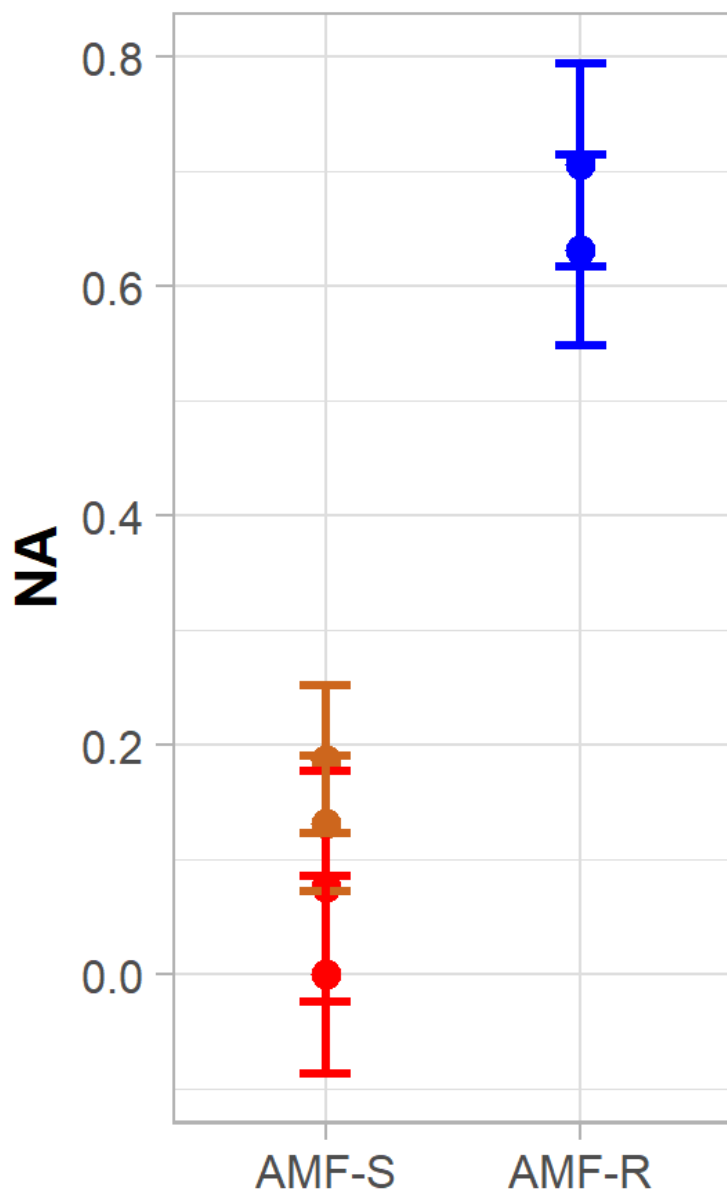

1\_210043371

5\_195739885

Genotype CML HET W22

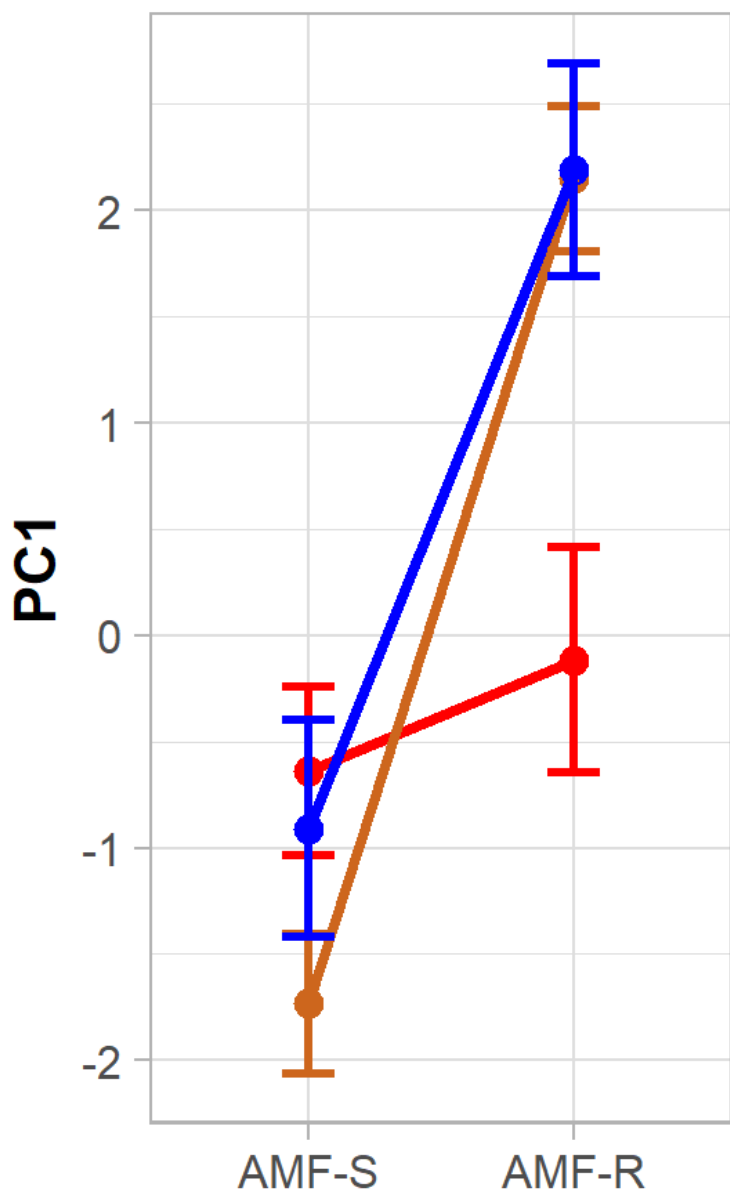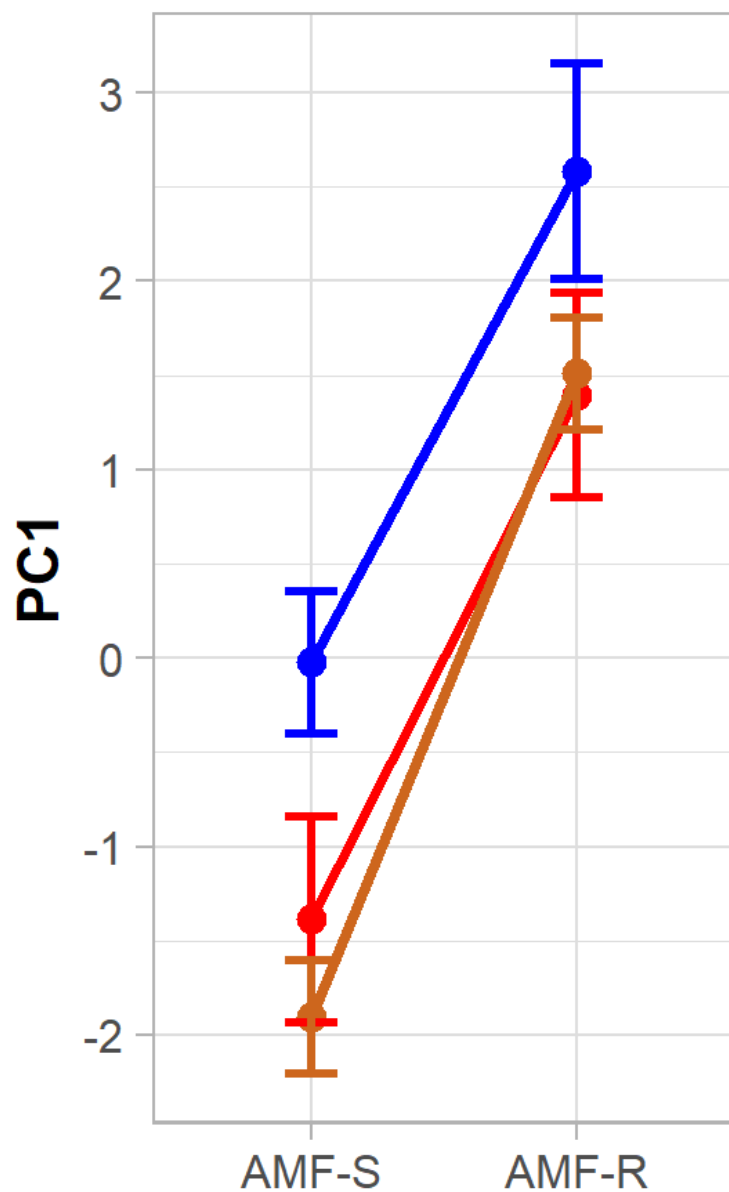

# 4\_182468257

**Genotype** ● CML ● HET ● W22

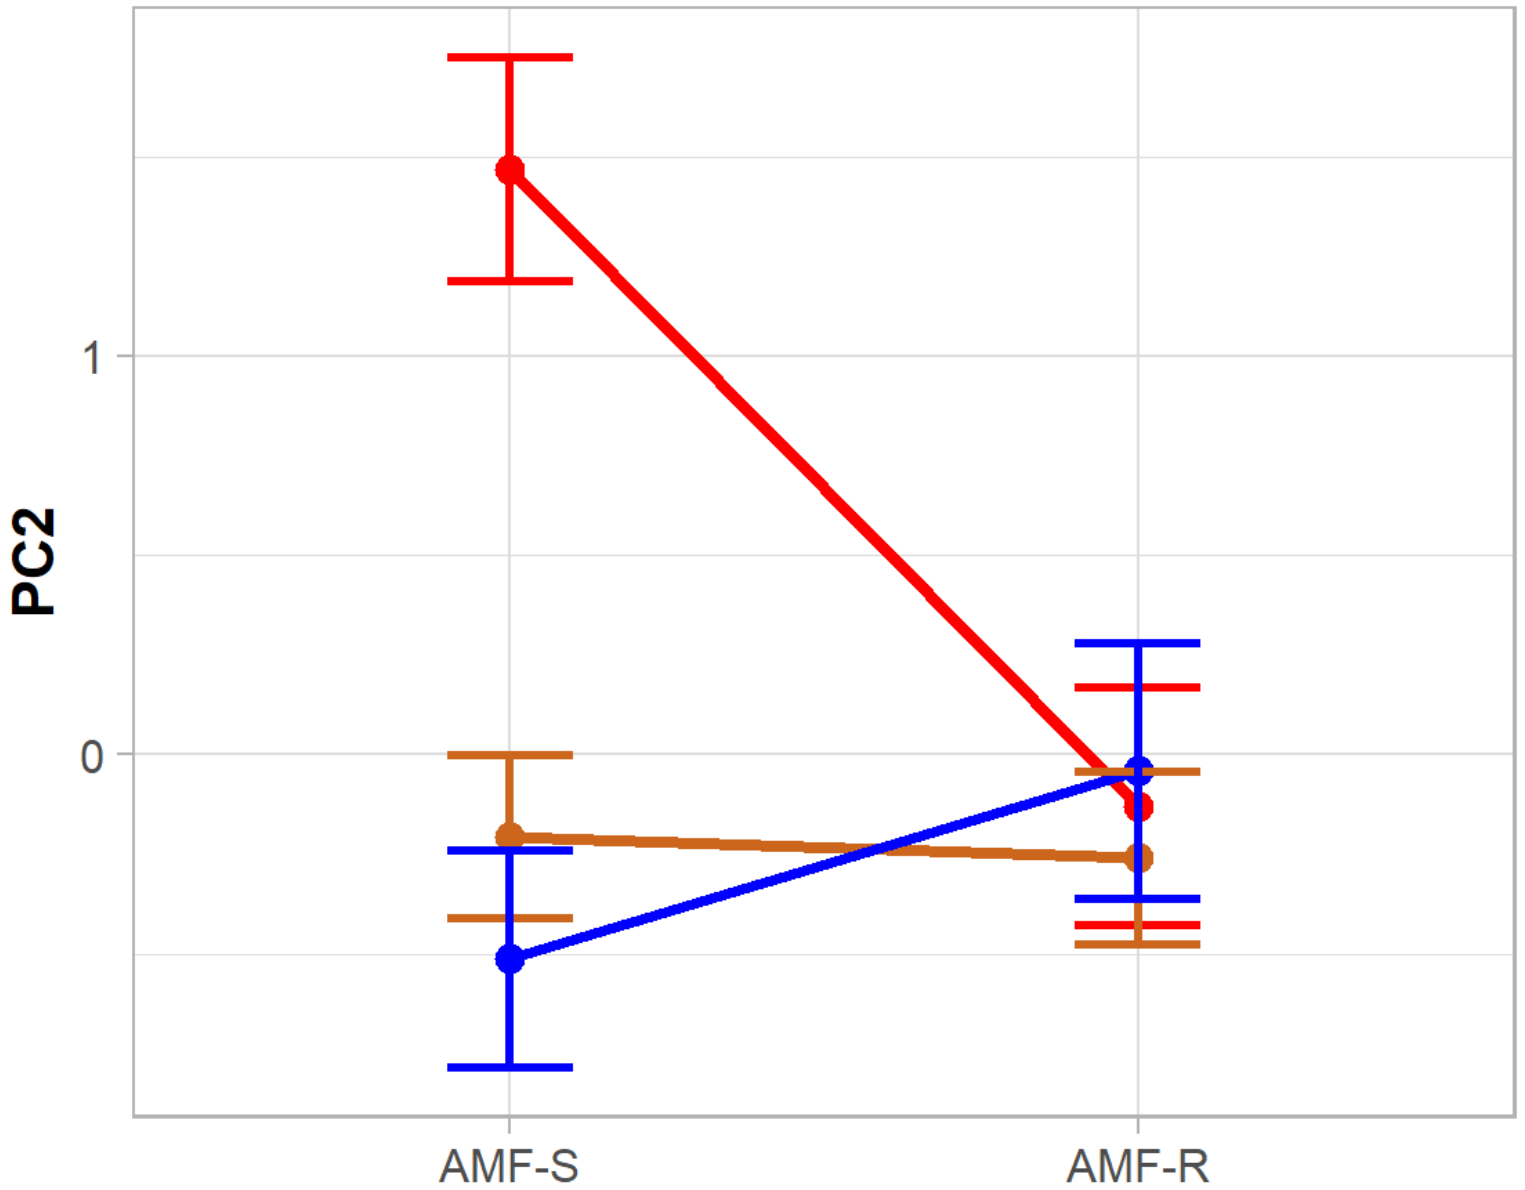

# 7\_127331731

**Genotype** CML HET W22

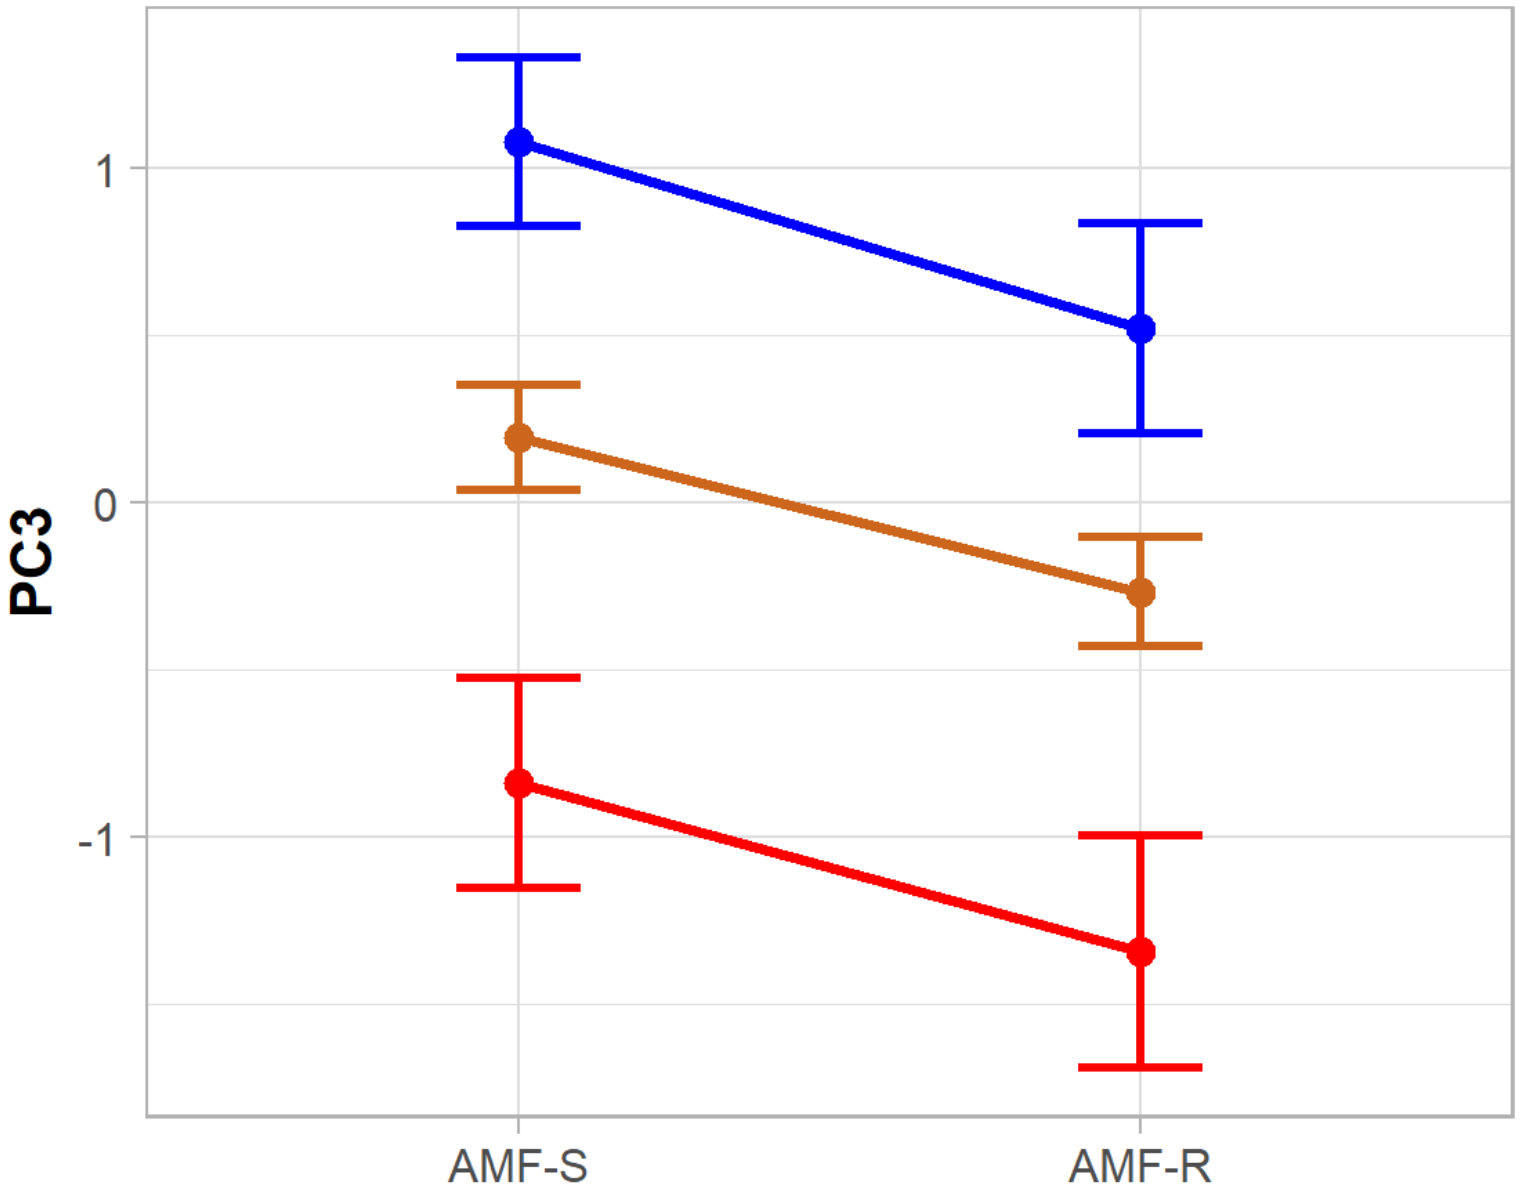

10\_144825247

3\_4896328

Genotype CML HET W22

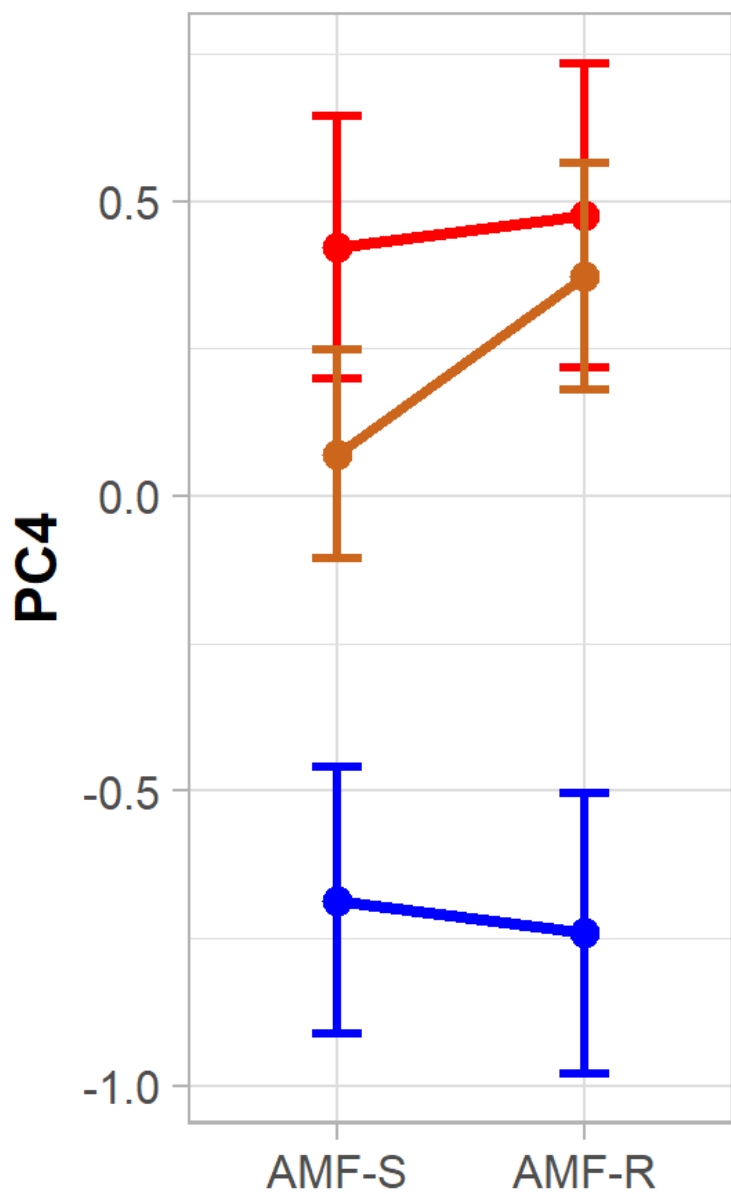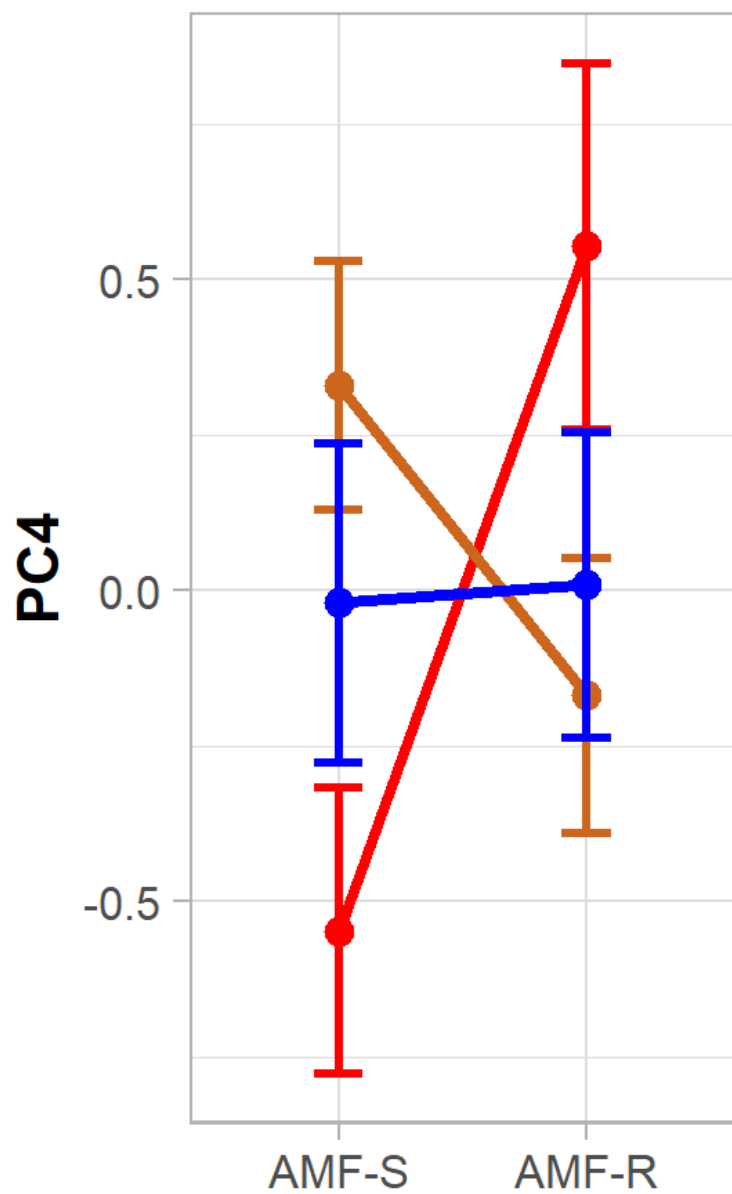

# 8\_8103592

**Genotype** ● CML ● HET ● W22

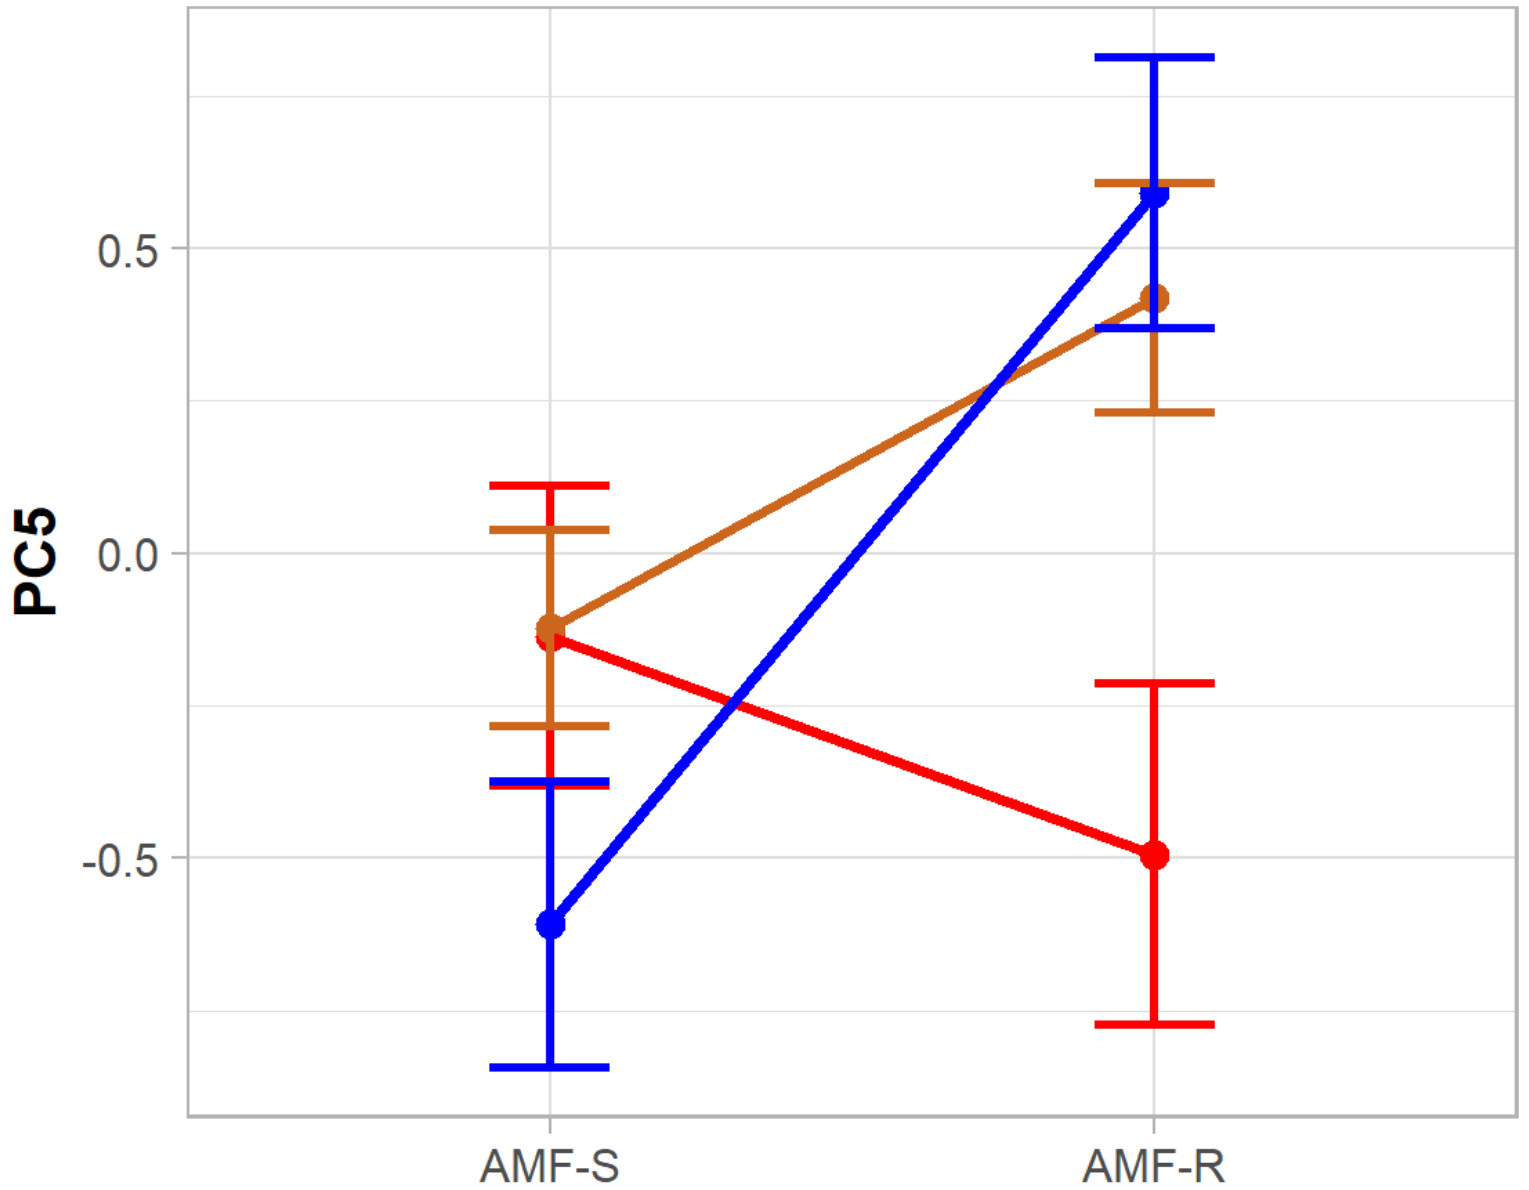

Supplement: fig4-data1 [file elife-61701-fig4-data1-v1.pdf]
